# Supplementary material for: The 19q12 Bladder Cancer GWAS Signal: Association with Cyclin E Function and Aggressive Disease
Source: Oxford University Press journal article supplement (doi:10.1158/0008-5472.can-14-1531), 2014-10-14
Supplement: 00085472can141531-sup-132141_1_supp_2593272_n9nznb.xls [file 00085472can141531-sup-132141_1_supp_2593272_n9nznb.xls]

## Sheet: GWAS12-ALL
Supplementary Table 5. Association results for +/− 30 Kb region of CCNE1 gene in NCI bladder cancer GWAS1 & GWAS2 samples (cases=5,942, controls=10,857).
Rank	Variant	bp	Source	Allele_1	Allele_2	IMPUTE2-score	r2 with rs8102137	MAF		p-val for HWE		Adjusted for covariates				Adjusted for covariates and rs8102137
								Cases	Controls	Cases	Controls	OR	95%CI_low	95%CI_upper	p-val	OR	95%CI_low	95%CI_upper	p-val
1	chr19:30293460	30293460	1KG	AGG	A	0.99073	0.991222	0.3553	0.3244	0.88742	0.065891	1.13293	1.07526	1.1937	2.8337e-06	1.59477	0.985287	2.58127	0.057656
2	rs57894940	30293462	1KG	G	A	0.99037	0.991348	0.35568	0.32465	0.86514	0.072637	1.13253	1.07488	1.19326	3.0233e-06	1.50469	0.946644	2.39172	0.084074
3	rs79576418	30290890	1KG	A	G	0.98355	0.990977	0.35429	0.32361	0.90969	0.048466	1.13293	1.07506	1.19392	3.0766e-06	1.48406	0.936887	2.35079	0.092667
4	rs62104473	30289779	1KG	C	T	0.97795	0.990783	0.35391	0.32326	0.93217	0.043568	1.13319	1.07516	1.19436	3.1357e-06	1.40665	0.917458	2.15668	0.11765
5	rs62107115	30289630	1KG	G	A	0.9775	0.990767	0.35386	0.32323	0.93217	0.043568	1.13321	1.07516	1.19439	3.1442e-06	1.40255	0.916165	2.14715	0.1196
6	rs8111487	30293267	1KG	C	T	0.99034	0.991203	0.35544	0.32448	0.90983	0.065922	1.13223	1.0746	1.19295	3.1753e-06	1.47766	0.927579	2.35396	0.10031
7	rs62104476	30294716	1KG	G	A	0.99333	0.991651	0.35571	0.32469	0.86514	0.072707	1.13185	1.07431	1.19247	3.2763e-06	1.4999	0.922778	2.43797	0.10208
8	rs17513752	30290811	1KG	A	G	0.98271	0.99097	0.35468	0.32388	0.93223	0.046134	1.13251	1.07467	1.19348	3.2858e-06	1.41258	0.90632	2.20164	0.12702
9	rs111640872	30290357	1KG	G	C	0.98134	0.990949	0.35454	0.32379	0.93225	0.043739	1.13256	1.07467	1.19357	3.3104e-06	1.40074	0.902498	2.17404	0.13287
10	rs62104478	30295306	1KG	G	A	0.99472	0.991536	0.35582	0.32477	0.84296	0.079957	1.13169	1.07419	1.19226	3.3131e-06	1.50462	0.920217	2.46016	0.10352
11	rs62104477	30294991	1KG	G	T	0.97812	0.990906	0.35183	0.32112	0.77607	0.10802	1.13297	1.07474	1.19434	3.5192e-06	1.32173	0.877533	1.99077	0.18235
12	rs17513613	30286822	1KG	T	C	0.97132	0.990909	0.35346	0.323	0.97735	0.026646	1.13287	1.07469	1.19419	3.5224e-06	1.30663	0.876996	1.94673	0.18892
13	rs62107111	30285548	1KG	C	T	0.96828	0.990864	0.35304	0.32268	0.97734	0.0237	1.13289	1.07462	1.19431	3.6316e-06	1.27381	0.868648	1.86794	0.2155
14	rs8102137	30296853	GWAS	T	C	--	--	0.35342	0.32339	0.64982	0.1957	1.12742	1.07008	1.18783	6.696e-06	--	--	--	--
15	rs59592823	30297516	1KG	A	G	0.99763	0.998802	0.35383	0.32372	0.71231	0.14187	1.12715	1.06982	1.18754	6.9774e-06	0.983635	0.382951	2.52653	0.97273
16	rs59868991	30297577	1KG	G	A	0.99786	0.998803	0.35371	0.3236	0.7122	0.15417	1.12697	1.06965	1.18736	7.1934e-06	0.926471	0.356583	2.40714	0.87549
17	chr19:30304254	30304254	1KG	CAGTT	C	0.98281	0.973725	0.34988	0.32136	0.75372	0.13453	1.12816	1.07021	1.18925	7.3896e-06	1.04514	0.785218	1.3911	0.76216
18	rs58989684	30299796	1KG	A	T	0.99352	0.998256	0.3546	0.32464	0.67072	0.18913	1.12703	1.0696	1.18755	7.4007e-06	0.970145	0.502114	1.87444	0.92799
19	rs7247779	30297919	1KG	G	C	0.9964	0.997595	0.35428	0.32419	0.69136	0.17441	1.12664	1.0693	1.18706	7.6746e-06	0.921009	0.454058	1.86817	0.81912
20	rs62104480	30298800	1KG	A	G	0.99567	0.997594	0.35429	0.32432	0.69136	0.18157	1.12618	1.06884	1.18659	8.2972e-06	0.867318	0.442751	1.69901	0.67787
21	rs56400371	30299634	1KG	A	C	0.99519	0.99746	0.3543	0.32441	0.69136	0.18164	1.12603	1.06869	1.18645	8.5269e-06	0.862129	0.453376	1.63941	0.65049
22	rs62104483	30300017	1KG	G	A	0.98189	0.988025	0.35823	0.329	0.75624	0.25827	1.1237	1.06633	1.18416	1.2869e-05	0.896076	0.6298	1.27493	0.54182
23	rs80125410	30340694	1KG	A	G	0.97424	0.515872	0.28937	0.26415	0.46809	0.19061	1.13268	1.07091	1.19802	1.3349e-05	1.0685	0.986515	1.1573	0.10382
24	rs16963425	30340724	1KG	G	A	0.9742	0.515851	0.28938	0.26415	0.46809	0.19062	1.13268	1.07091	1.19802	1.3358e-05	1.06849	0.986509	1.15729	0.10386
25	rs3218036	30305684	1KG	G	A	0.98627	0.976904	0.3512	0.32332	0.81983	0.14772	1.1238	1.06626	1.18446	1.3484e-05	0.924964	0.680134	1.25793	0.61911
26	rs62104504	30341864	1KG	G	A	0.97252	0.515919	0.28941	0.26422	0.46799	0.1669	1.13255	1.07075	1.19792	1.3759e-05	1.06815	0.986178	1.15693	0.1056
27	chr19:30313523	30313523	1KG	CCTT	C	0.96399	0.964739	0.35096	0.32319	0.86432	0.072022	1.12467	1.06654	1.18597	1.4309e-05	0.97697	0.774893	1.23174	0.8445
28	rs4556910	30342679	1KG	A	T	0.97285	0.515632	0.2882	0.263	0.35908	0.13739	1.13215	1.07035	1.19752	1.4653e-05	1.06727	0.985286	1.15607	0.11036
29	rs56184865	30343500	1KG	G	A	0.96647	0.511649	0.2907	0.26549	0.45029	0.12713	1.1312	1.06943	1.19654	1.6889e-05	1.06574	0.984353	1.15387	0.11621
30	rs12151208	30286245	1KG	A	G	0.96529	0.976601	0.35695	0.32682	0.88764	0.026086	1.12249	1.06484	1.18326	1.7424e-05	0.911255	0.691006	1.2017	0.51032
31	rs8111686	30288177	1KG	G	A	0.94428	0.972842	0.35368	0.32393	1	0.048623	1.12405	1.06558	1.18574	1.7844e-05	0.947182	0.746028	1.20257	0.65624
32	rs2161516	30288488	1KG	C	T	0.96609	0.972544	0.35761	0.32761	0.79933	0.029329	1.12208	1.06446	1.18281	1.8439e-05	0.916407	0.703892	1.19308	0.51689
33	chr19:30286037	30286037	1KG	G	GCCTGTAATC	0.96683	0.977004	0.3572	0.32715	0.88767	0.030874	1.12184	1.06427	1.18252	1.8912e-05	0.898014	0.680365	1.18529	0.447
34	rs56115059	30343666	1KG	A	C	0.94277	0.498002	0.28306	0.25881	0.44298	0.079967	1.13307	1.06998	1.19988	1.9202e-05	1.06544	0.982711	1.15514	0.12433
35	rs55930881	30343667	1KG	G	C	0.94277	0.498002	0.28306	0.25881	0.44298	0.079967	1.13307	1.06998	1.19988	1.9207e-05	1.06544	0.982705	1.15513	0.12435
36	rs16963431	30344536	1KG	C	T	0.96474	0.51105	0.28944	0.26492	0.39434	0.12049	1.12873	1.06702	1.194	2.4274e-05	1.06105	0.980111	1.14867	0.14333
37	rs60560217	30288545	1KG	T	C	0.96807	0.97536	0.35604	0.32627	0.93236	0.042319	1.11988	1.06239	1.18048	2.545e-05	0.852238	0.64471	1.12657	0.2618
38	rs75996259	30302546	1KG	C	T	0.90187	0.71512	0.42604	0.39994	0.36714	0.09302	1.11626	1.05897	1.17664	4.2798e-05	1.03241	0.940229	1.13363	0.50395
39	rs56313825	30300841	1KG	G	A	0.98637	0.808948	0.41099	0.38384	0.34839	0.22349	1.11123	1.05613	1.16921	4.8159e-05	1.01048	0.906243	1.1267	0.85113
40	rs997669	30304483	GWAS	T	C	--	0.75877	0.41367	0.38703	0.25022	0.30227	1.10971	1.05505	1.16721	5.3635e-05	1.01278	0.913536	1.12281	0.80924
41	rs56285422	30319892	1KG	C	T	0.95965	0.915341	0.33819	0.31203	0.95378	0.085175	1.11693	1.0585	1.17857	5.4736e-05	0.953662	0.814549	1.11653	0.55548
42	rs7257330	30301823	1KG	G	A	0.99616	0.767193	0.41374	0.38689	0.29699	0.2406	1.10867	1.05401	1.16616	6.3515e-05	1.00756	0.908035	1.118	0.88712
43	rs113780919	30319203	1KG	G	A	0.93954	0.913864	0.33324	0.30804	0.88392	0.095748	1.11729	1.05804	1.17987	6.6279e-05	0.950493	0.814323	1.10943	0.51933
44	rs7257694	30314666	1KG	C	T	0.97949	0.766238	0.40847	0.38256	0.59132	0.20058	1.10817	1.05306	1.16617	7.9379e-05	1.00399	0.905641	1.11302	0.9395
45	rs113701136	30277729	1KG	C	T	0.93869	0.917391	0.34646	0.3184	0.45623	0.028568	1.11391	1.05571	1.17533	8.1614e-05	0.948566	0.818654	1.09909	0.48257
46	rs7250389	30325332	1KG	G	T	0.97026	0.880863	0.34122	0.31519	0.8853	0.11438	1.11258	1.05483	1.17349	8.7569e-05	0.951929	0.825622	1.09756	0.4976
47	rs3218069	30313576	1KG	C	T	0.97968	0.76626	0.40904	0.3833	0.64829	0.16744	1.10734	1.05231	1.16524	8.8222e-05	1.0011	0.902982	1.10988	0.98313
48	rs7250406	30325379	1KG	G	A	0.96982	0.881002	0.34163	0.31559	0.90816	0.13083	1.11242	1.05467	1.17334	8.9726e-05	0.950829	0.824644	1.09632	0.48773
49	rs12460611	30326600	1KG	A	G	0.97008	0.878011	0.34167	0.31563	0.88534	0.13659	1.11226	1.05451	1.17316	9.17e-05	0.952519	0.827512	1.09641	0.49783
50	rs3218070	30313603	1KG	C	G	0.97995	0.767186	0.40854	0.38288	0.59136	0.18681	1.10693	1.0519	1.16483	9.4159e-05	0.999197	0.901066	1.10802	0.98785
51	rs7250914	30325682	1KG	G	A	0.97001	0.878215	0.34156	0.31558	0.90813	0.13083	1.11207	1.05433	1.17296	9.4198e-05	0.949911	0.824515	1.09438	0.47719
52	rs17599450	30328753	1KG	C	T	0.96799	0.877407	0.34147	0.31556	0.8853	0.13081	1.11218	1.05438	1.17315	9.4355e-05	0.953319	0.829186	1.09603	0.50172
53	rs3218027	30303352	1KG	T	C	0.91211	0.729045	0.41194	0.38683	0.20812	0.51734	1.10963	1.05236	1.17003	0.00011938	1.00737	0.914383	1.10981	0.8815
54	rs1473201	30290349	1KG	A	G	0.97924	0.402254	0.42463	0.45339	0.54138	0.40503	1.10183	1.04758	1.15888	0.00016678	1.04115	0.97561	1.11109	0.22421
55	rs4804903	30293066	GWAS	T	C	--	0.260904	0.32733	0.35581	0.15731	0.48968	1.1042	1.04797	1.16346	0.0002019	1.05355	0.991483	1.11949	0.092205
56	rs4334416	30287967	1KG	C	G	0.95597	0.411245	0.43043	0.4585	0.54276	0.26221	1.09907	1.04449	1.15651	0.00027824	1.03584	0.970156	1.10596	0.29204
57	chr19:30303379	30303379	1KG	GA	G	0.96174	0.717755	0.4287	0.40615	0.67173	0.29164	1.09917	1.04448	1.15672	0.00028205	0.986411	0.897435	1.08421	0.77666
58	chr19:30321864	30321864	1KG	A	AT	0.97197	0.797036	0.3801	0.35521	0.91232	0.16035	1.09675	1.0413	1.15515	0.00048469	0.946856	0.849163	1.05579	0.32575
59	chr19:30323079	30323079	1KG	CTTTTCT	C	0.95551	0.268921	0.36987	0.39707	0.048174	0.2214	1.09509	1.03971	1.15343	0.0006025	1.04323	0.982531	1.10768	0.16647
60	rs3218051	30310302	1KG	A	G	0.98756	0.261709	0.33102	0.35726	0.10719	0.53068	1.09516	1.03919	1.15415	0.00068315	1.04169	0.980133	1.1071	0.18876
61	chr19:30327348	30327348	1KG	GA	G	0.91583	0.00186061	0.0028877	0.0035531	0.046244	0.0079474	0.509579	0.337463	0.76948	0.0013447	0.53157	0.351723	0.803379	0.002708
Rank	Variant	bp	Source	Allele_1	Allele_2	IMPUTE2-score	r2 with rs8102137	MAF		p-val for HWE		Adjusted for covariates				Adjusted for covariates and rs8102137
								Cases	Controls	Cases	Controls	OR	95%CI_low	95%CI_upper	p-val	OR	95%CI_low	95%CI_upper	p-val
62	rs78253220	30325829	1KG	C	T	0.91947	0.000102831	0.00012151	0.0010348	1	1	0.230455	0.0924706	0.574339	0.0016311	0.236478	0.0948447	0.589615	0.0019788
63	rs6509737	30331585	1KG	G	A	0.96732	0.241377	0.43636	0.41095	0.012217	0.33134	1.08474	1.03079	1.14151	0.0017786	1.03434	0.976227	1.09592	0.25244
64	chr19:30326622	30326622	1KG	GGACA	G	0.92573	0.000102685	0.0001295	0.0010263	1	1	0.239908	0.0964091	0.596996	0.002148	0.245343	0.0985119	0.611022	0.0025435
65	rs8106054	30319896	1KG	C	G	0.98452	0.265528	0.35705	0.38276	0.051168	0.32958	1.08379	1.02933	1.14113	0.0022217	1.0289	0.969246	1.09223	0.34978
66	rs78022837	30326975	1KG	A	G	0.90973	0.000102685	0.00014187	0.0010392	1	1	0.241787	0.0973432	0.600563	0.002225	0.247239	0.0994681	0.61454	0.0026287
67	rs918586	30322427	1KG	A	G	0.99313	0.258984	0.35555	0.3816	0.044435	0.32899	1.08302	1.02881	1.14009	0.0023333	1.02845	0.969104	1.09142	0.35499
68	rs10409876	30335047	1KG	A	G	0.97799	0.22986	0.43176	0.40657	0.0075603	0.26538	1.08197	1.02842	1.13831	0.0023498	1.03206	0.974569	1.09294	0.28058
69	rs4805484	30320745	1KG	G	A	0.98891	0.263458	0.35694	0.38227	0.044728	0.34993	1.08125	1.02702	1.13834	0.0029242	1.02569	0.966288	1.08874	0.40469
70	rs9653120	30319261	1KG	A	G	0.97678	0.239052	0.33623	0.36001	0.16294	0.34865	1.08312	1.02761	1.14163	0.0029321	1.03013	0.970314	1.09363	0.33078
71	rs918588	30328941	1KG	A	G	0.99398	0.252609	0.35506	0.38078	0.054015	0.34919	1.07999	1.02593	1.1369	0.0033144	1.0251	0.966105	1.0877	0.41233
72	rs1961641	30328422	1KG	T	C	0.996	0.252786	0.35605	0.38166	0.061783	0.38196	1.07932	1.02535	1.13614	0.0035423	1.02422	0.965293	1.08674	0.42866
73	rs918587	30325256	GWAS	T	C	--	0.252502	0.35653	0.38215	0.07486	0.50247	1.079	1.02511	1.13573	0.0036293	1.02389	0.965057	1.08632	0.4342
74	rs4805487	30337127	GWAS	A	C	--	0.201272	0.44884	0.42461	0.083591	0.81367	1.07698	1.02422	1.13246	0.003806	1.02951	0.973474	1.08876	0.30846
75	rs6509742	30336828	1KG	G	C	0.99652	0.202394	0.44837	0.42414	0.058948	0.98433	1.07693	1.02414	1.13244	0.0038494	1.02928	0.97319	1.0886	0.31278
76	rs929814	30340412	1KG	A	G	0.98635	0.206702	0.44991	0.4256	0.079051	1	1.0768	1.02378	1.13256	0.0040747	1.02862	0.97226	1.08824	0.32635
77	rs10408616	30334852	1KG	C	G	0.9812	0.224683	0.43423	0.40996	0.011253	0.37197	1.07681	1.02362	1.13278	0.0041969	1.02659	0.969692	1.08683	0.36696
78	rs34331990	30321561	1KG	T	G	0.9864	0.634623	0.43363	0.40906	0.71157	0.34067	1.07386	1.02107	1.12937	0.0055934	0.949352	0.874845	1.0302	0.2126
79	rs10406613	30276911	GWAS	G	A	--	0.155675	0.23519	0.25601	0.63937	0.49642	0.926681	0.875119	0.981281	0.0091349	0.97113	0.912336	1.03371	0.35788
80	rs67183076	30273117	1KG	G	A	0.99071	0.156909	0.23596	0.25611	0.44995	0.39166	0.927217	0.875503	0.981985	0.0098556	0.972198	0.913146	1.03507	0.37779
81	rs11667347	30274623	GWAS	G	A	--	0.157456	0.23763	0.25762	0.4964	0.49818	0.928041	0.876586	0.982518	0.010287	0.972895	0.914145	1.03542	0.38721
82	rs67290013	30275213	1KG	C	G	0.98921	0.160869	0.23882	0.25901	0.47531	0.39518	0.928311	0.876709	0.982949	0.010791	0.973984	0.914893	1.03689	0.40912
83	rs11672936	30279370	1KG	G	A	0.98774	0.165535	0.23631	0.25641	0.49444	0.24691	0.928355	0.876555	0.983216	0.011153	0.974541	0.91513	1.03781	0.42166
84	rs66894626	30277486	1KG	A	T	0.99712	0.156908	0.23666	0.25665	0.54135	0.36509	0.929754	0.87809	0.984458	0.012526	0.975176	0.916156	1.038	0.43
85	rs7246015	30276514	1KG	C	T	0.99808	0.157202	0.2367	0.25662	0.51801	0.36508	0.929984	0.878334	0.984671	0.012778	0.97539	0.916396	1.03818	0.43373
86	rs8110447	30330444	GWAS	G	A	--	0.357985	0.44791	0.47126	0.066411	0.98464	0.951142	0.904898	0.999749	0.048847	1.02714	0.965525	1.0927	0.39616
87	rs56027477	30298412	1KG	C	A	0.95879	0.0598102	0.10762	0.11512	0.0081798	0.60424	0.933286	0.86215	1.01029	0.087842	0.97649	0.899274	1.06034	0.57137
88	rs13343418	30341395	1KG	A	G	0.92713	0.0027066	0.0061618	0.0055724	0.020293	0.0042901	0.760788	0.554252	1.04429	0.090692	0.79301	0.577352	1.08922	0.15207
89	rs73038998	30331965	1KG	T	C	0.90447	0.00896198	0.15531	0.1638	0.033244	0.26214	0.943792	0.87952	1.01276	0.10791	0.952712	0.887642	1.02255	0.17955
90	rs7248315	30280441	1KG	A	T	0.94307	0.308596	0.41585	0.42444	0.48756	0.18809	1.04239	0.990341	1.09718	0.11215	0.969073	0.911663	1.0301	0.31338
91	rs76717523	30297143	1KG	C	T	0.92476	0.000551479	0.0014132	0.00067827	1	1	1.91523	0.848799	4.32154	0.11754	2.03127	0.89839	4.59271	0.088654
92	rs144089374	30319519	1KG	G	A	0.91414	0.0517722	0.11602	0.11853	0.44741	0.58155	0.941409	0.869069	1.01977	0.13884	0.976704	0.899841	1.06013	0.573
93	chr19:30273475	30273475	1KG	GTC	G	0.93261	0.031767	0.11304	0.11119	0.43716	0.0047757	1.06201	0.979217	1.15181	0.14626	1.09184	1.00576	1.18529	0.035988
94	rs1107672	30279199	1KG	A	G	0.9468	0.258243	0.37602	0.38499	0.91193	0.37249	1.03926	0.986469	1.09488	0.14766	0.973601	0.91691	1.0338	0.38216
95	rs11666333	30280567	1KG	C	T	0.93254	0.0364997	0.11282	0.11091	0.27039	0.0021222	1.06068	0.978133	1.1502	0.15411	1.09261	1.0065	1.1861	0.034459
96	rs1862541	30322301	GWAS	G	T	--	0.0579766	0.10636	0.11311	0.0026086	0.70185	0.945059	0.873932	1.02198	0.15693	0.986559	0.909821	1.06977	0.74326
97	rs11084229	30334417	1KG	C	A	0.95378	0.0749128	0.15505	0.15534	0.074482	0.40023	0.959739	0.896026	1.02798	0.24098	1.0026	0.93326	1.0771	0.94333
98	rs6509743	30336837	1KG	C	T	0.97561	0.0747356	0.15592	0.15604	0.084306	0.55971	0.960818	0.897746	1.02832	0.24857	1.00258	0.934092	1.07609	0.94312
99	chr19:30336883	30336883	1KG	CTT	C	0.97573	0.0747999	0.15595	0.15605	0.084306	0.55988	0.960986	0.89791	1.02849	0.25061	1.00277	0.934274	1.07628	0.93898
100	rs12971623	30333944	1KG	C	T	0.95912	0.073692	0.15383	0.1537	0.065133	0.46049	0.96115	0.897253	1.0296	0.25889	1.00385	0.934368	1.07849	0.91645
101	rs7254392	30336114	1KG	C	G	0.9701	0.0751849	0.15665	0.1563	0.049228	0.5604	0.962538	0.899292	1.03023	0.27086	1.00487	0.93613	1.07866	0.89308
102	rs4805486	30327200	1KG	C	A	0.95898	0.183854	0.30522	0.30674	0.14201	0.090506	0.9704	0.919302	1.02434	0.27628	1.0276	0.967927	1.09094	0.37242
103	rs4804905	30338472	1KG	A	G	0.99747	0.0624955	0.11547	0.11542	0.08578	0.74202	0.959465	0.888913	1.03562	0.2883	1.00582	0.928944	1.08905	0.88628
104	rs3218026	30303138	1KG	C	A	0.91741	0.161178	0.23182	0.23598	0.61017	0.0084102	0.969669	0.91316	1.02968	0.3147	1.0322	0.9661	1.10282	0.34792
105	rs4805483	30314459	1KG	A	G	0.96658	0.0628805	0.11514	0.11555	0.30789	0.34734	0.963526	0.891374	1.04152	0.34945	1.01331	0.934213	1.09911	0.74981
106	rs10500242	30328586	1KG	G	A	0.90848	0.0253661	0.050834	0.050793	1	0.54841	0.94558	0.840239	1.06413	0.35312	0.983887	0.872834	1.10907	0.79038
107	rs10402908	30341553	1KG	A	G	0.9851	0.062965	0.1194	0.11835	0.15548	1	0.965777	0.895181	1.04194	0.36857	1.01218	0.935332	1.09533	0.76385
108	rs10408388	30341427	1KG	T	C	0.9854	0.062963	0.1194	0.11834	0.15548	1	0.965803	0.895214	1.04196	0.36889	1.0122	0.93536	1.09535	0.76345
109	rs929813	30340381	1KG	C	T	0.98792	0.0630025	0.11942	0.11835	0.15548	1	0.965875	0.895358	1.04195	0.36937	1.01219	0.935442	1.09524	0.76326
110	rs8100652	30324448	1KG	G	C	0.96599	0.17976	0.30152	0.30199	0.096235	0.0619	0.975747	0.924394	1.02995	0.37341	1.03361	0.973761	1.09714	0.27735
111	rs10406228	30327248	1KG	T	C	0.9162	0.0277458	0.053208	0.053254	1	0.39136	0.95139	0.847848	1.06758	0.39662	0.989796	0.88061	1.11252	0.86346
112	chr19:30314457	30314457	1KG	A	AG	0.93896	0.0559509	0.11132	0.11132	0.55479	0.52802	0.966084	0.891528	1.04688	0.3998	1.01766	0.935832	1.10664	0.68222
113	rs735319	30339140	GWAS	A	G	--	0.0634727	0.11831	0.11707	0.15224	0.96299	0.968289	0.897661	1.04447	0.40432	1.01561	0.938597	1.09895	0.70022
114	rs4805485	30326771	1KG	G	C	0.91713	0.0276986	0.053177	0.053214	1	0.39132	0.952216	0.84859	1.0685	0.40489	0.9907	0.881416	1.11353	0.8755
115	rs79185930	30344619	1KG	T	G	0.95298	0.0600636	0.11634	0.11512	0.088198	0.50933	0.9679	0.895444	1.04622	0.41115	1.01677	0.93762	1.1026	0.68749
116	rs10414632	30307003	1KG	T	C	0.94647	0.0197944	0.038259	0.038227	0.5937	0.18876	0.94836	0.831338	1.08186	0.43006	0.991099	0.867162	1.13275	0.89562
117	rs3218038	30305895	1KG	G	T	0.9559	0.0194012	0.037848	0.03786	0.58938	0.23279	0.949344	0.832114	1.08309	0.4395	0.991968	0.867844	1.13384	0.90587
118	rs12462504	30344208	1KG	T	C	0.91421	0.00695169	0.039031	0.039976	0.48516	0.61689	0.952378	0.836137	1.08478	0.46253	0.968356	0.849711	1.10357	0.62968
119	rs116871382	30336763	1KG	C	T	0.92555	0.00827189	0.038054	0.039212	0.59139	0.70069	0.953344	0.836439	1.08659	0.47409	0.970507	0.85101	1.10678	0.6552
120	rs36193392	30317537	1KG	C	T	0.92947	0.020471	0.060345	0.063101	0.30085	0.37071	0.962229	0.865861	1.06932	0.47453	0.991859	0.891448	1.10358	0.88067
121	rs1811303	30325583	1KG	A	C	0.93976	0.172108	0.30746	0.30708	0.054884	0.030359	0.980676	0.928714	1.03555	0.48236	1.03891	0.978574	1.10296	0.21116
122	rs118177621	30297329	1KG	G	C	0.98615	0.0314545	0.057259	0.059841	1	0.66972	0.963853	0.867706	1.07065	0.49228	1.00755	0.905001	1.12172	0.89074
123	rs146454552	30293646	1KG	C	A	0.9349	0.00786702	0.018352	0.020419	0.13137	1	0.938734	0.782128	1.1267	0.49717	0.982185	0.816736	1.18115	0.84852
Rank	Variant	bp	Source	Allele_1	Allele_2	IMPUTE2-score	r2 with rs8102137	MAF		p-val for HWE		Adjusted for covariates				Adjusted for covariates and rs8102137
								Cases	Controls	Cases	Controls	OR	95%CI_low	95%CI_upper	p-val	OR	95%CI_low	95%CI_upper	p-val
124	rs184184366	30323246	1KG	C	T	0.91831	0.00851055	0.038026	0.038858	0.85798	0.79698	0.956493	0.838174	1.09151	0.50909	0.974953	0.85382	1.11327	0.70784
125	rs12460396	30325377	1KG	T	C	0.9229	0.00848979	0.037896	0.038671	0.85728	0.79577	0.956735	0.838406	1.09176	0.51143	0.974816	0.853733	1.11307	0.70621
126	rs138512713	30323463	1KG	G	A	0.91937	0.00847218	0.037964	0.03877	0.85761	0.79655	0.956727	0.838339	1.09183	0.51158	0.975051	0.853871	1.11343	0.70905
127	rs77319773	30321724	1KG	A	G	0.91914	0.00906111	0.039197	0.039831	1	1	0.961446	0.843971	1.09527	0.55431	0.980796	0.860398	1.11804	0.77168
128	rs11084238	30344435	1KG	C	T	0.95916	0.0545942	0.10739	0.10699	0.19746	0.36594	0.976462	0.900817	1.05846	0.5626	1.02644	0.943942	1.11615	0.54154
129	rs79022614	30328803	1KG	G	A	0.92187	0.00835729	0.038134	0.038787	0.85837	0.79697	0.962131	0.843244	1.09778	0.56619	0.980143	0.858513	1.119	0.7667
130	rs79254467	30322927	1KG	G	T	0.90487	0.0255101	0.051364	0.050919	0.89334	0.42619	0.967828	0.859881	1.08933	0.58784	1.00785	0.893954	1.13626	0.89829
131	rs78287840	30322929	1KG	G	T	0.90487	0.0255101	0.051364	0.050919	0.89334	0.42619	0.967831	0.859883	1.08933	0.58787	1.00786	0.893956	1.13627	0.89826
132	rs12982841	30331915	1KG	G	A	0.96602	0.0582566	0.1106	0.11034	0.20986	0.76921	0.98178	0.906751	1.06302	0.6503	1.03076	0.949141	1.1194	0.47164
133	rs1862542	30328851	1KG	C	T	0.99693	0.115392	0.20762	0.20568	0.40764	0.052496	1.01354	0.95369	1.07715	0.66488	1.07436	1.00652	1.14676	0.031134
134	rs11883361	30327503	1KG	C	T	0.99915	0.115645	0.20759	0.20567	0.40757	0.052496	1.01246	0.952741	1.07592	0.68973	1.07308	1.00539	1.14532	0.033852
135	rs12983296	30327352	1KG	G	C	0.99913	0.115645	0.20758	0.20566	0.40764	0.052478	1.01244	0.952716	1.0759	0.69032	1.07306	1.00537	1.1453	0.033905
136	rs7255959	30326564	1KG	C	T	0.99938	0.115645	0.20751	0.20559	0.42999	0.056128	1.01231	0.952589	1.07577	0.69337	1.07295	1.00526	1.1452	0.03419
137	rs10418136	30326047	1KG	C	T	0.99874	0.115518	0.20739	0.20557	0.42993	0.059961	1.01205	0.952328	1.07552	0.6995	1.0727	1.00499	1.14496	0.034883
138	rs10422285	30309423	1KG	G	A	0.98347	0.168671	0.25557	0.2549	0.19501	0.05164	0.989066	0.934782	1.0465	0.70267	1.05446	0.990663	1.12236	0.095838
139	chr19:30325388	30325388	1KG	CA	C	0.99673	0.115578	0.20751	0.20571	0.42992	0.06416	1.0119	0.952146	1.07541	0.70321	1.07264	1.00489	1.14497	0.035165
140	rs117977791	30337645	1KG	C	T	0.99236	0.0584473	0.11176	0.11089	0.23879	0.80762	0.984975	0.910895	1.06508	0.70432	1.03483	0.954055	1.12245	0.40895
141	rs728427	30328212	GWAS	C	T	--	0.115264	0.20751	0.20577	0.4076	0.060166	1.01173	0.952058	1.07515	0.70687	1.0721	1.00449	1.14426	0.036201
142	rs76075816	30300589	1KG	G	A	0.95862	0.018787	0.037032	0.036451	0.71354	0.21531	0.975503	0.853213	1.11532	0.71666	1.0203	0.890706	1.16876	0.7718
143	rs8104026	30316536	1KG	G	C	0.97462	0.118273	0.21124	0.20952	0.69684	0.059521	1.01135	0.951485	1.07499	0.71689	1.07285	1.00483	1.14547	0.035349
144	rs183457744	30277294	1KG	C	T	0.92092	0.00122027	0.0027916	0.0029692	1	1	0.923929	0.575374	1.48363	0.74334	0.962932	0.598067	1.55039	0.87647
145	rs180772063	30286301	1KG	A	T	0.90751	0.00122152	0.0028639	0.0030054	1	1	0.939653	0.58488	1.50962	0.79693	0.98037	0.608456	1.57961	0.93508
146	rs148060160	30324195	1KG	G	C	0.90735	0.00275237	0.014517	0.014455	0.034808	0.72983	1.02444	0.825418	1.27145	0.82658	1.0534	0.847901	1.3087	0.63848
147	rs3218076	30315270	1KG	T	G	0.98242	0.168077	0.25577	0.25445	0.14275	0.04296	0.993816	0.939251	1.05155	0.82954	1.05978	0.995764	1.12791	0.067787
148	rs10425066	30326294	GWAS	T	C	--	0.115448	0.20776	0.20664	0.38595	0.0695	1.0061	0.946816	1.0691	0.84439	1.06533	0.998197	1.13698	0.056692
149	rs10421341	30308997	1KG	G	A	0.98714	0.169449	0.25293	0.25186	0.1697	0.036724	0.994383	0.939735	1.05221	0.84514	1.06228	0.997814	1.1309	0.058566
150	rs8103402	30319750	1KG	A	G	0.98074	0.119994	0.20992	0.20922	0.53128	0.059369	1.00488	0.945464	1.06804	0.87551	1.06574	0.998142	1.13791	0.056863
151	rs4805482	30299206	1KG	T	G	0.93747	0.0188506	0.038782	0.037761	0.60347	0.23193	0.989783	0.866699	1.13035	0.87952	1.03592	0.905364	1.1853	0.60764
152	rs10410784	30325762	1KG	G	A	0.91326	3.57e-06	0.00017536	0.0001085	1	1	1.15977	0.152592	8.81476	0.88611	1.15009	0.151526	8.72922	0.89242
153	rs143221530	30278131	1KG	A	G	0.90058	7.38e-05	0.00053972	0.00041383	1	1	1.07336	0.339269	3.39583	0.90411	1.10441	0.348665	3.49823	0.86594
154	rs11084196	30294146	1KG	C	T	0.98371	0.139599	0.21755	0.21781	1	0.055375	0.996495	0.938532	1.05804	0.90858	1.06053	0.993577	1.13199	0.077351
155	rs10417306	30295008	1KG	T	C	0.98517	0.13921	0.21741	0.21769	1	0.058934	0.996523	0.93858	1.05804	0.90925	1.06069	0.993729	1.13215	0.076575
156	rs11671136	30295633	1KG	G	A	0.98628	0.13939	0.21732	0.21761	1	0.062744	0.996527	0.938601	1.05803	0.90934	1.06078	0.993823	1.13225	0.076117
157	rs4805481	30294815	1KG	C	T	0.9788	0.137872	0.21661	0.21682	0.93904	0.062148	0.996748	0.938525	1.05858	0.91552	1.06129	0.993992	1.13315	0.075117
158	rs8108005	30336609	1KG	G	A	0.91291	0.000100961	0.00049933	0.00042047	1	1	0.943572	0.299423	2.97348	0.92099	0.97362	0.30874	3.07034	0.96361
159	rs114270658	30333745	1KG	C	T	0.91456	0.000100885	0.00050345	0.00041646	1	1	0.95663	0.303709	3.01321	0.93962	0.98678	0.313048	3.11049	0.98187
160	rs1406	30315112	GWAS	C	A	--	0.136713	0.21567	0.21502	0.90841	0.099179	1.0023	0.944194	1.06399	0.9398	1.06652	0.999553	1.13797	0.051595
161	rs11668288	30295502	1KG	T	C	0.98391	0.140059	0.21865	0.21857	0.93943	0.067809	0.997995	0.939993	1.05958	0.94763	1.06289	0.995776	1.13452	0.066819
162	rs67237737	30302239	1KG	C	T	0.96968	0.135988	0.21734	0.21629	0.61991	0.014869	1.00019	0.941741	1.06227	0.99498	1.06463	0.997215	1.1366	0.060602
163	rs147273499	30325292	1KG	C	G	0.91991	0.000100871	0.00051708	0.00040725	1	1	0.998914	0.318879	3.12918	0.99851	1.02906	0.328128	3.22727	0.96083
164	rs182489308	30283001	1KG	A	G	1	--	0	0	1	1
165	rs187849648	30287137	1KG	A	T	1	--	0	0	1	1

## Sheet: GWAS12-NonAggressive
Supplementary Table 5-1. Association results for +/− 30 Kb region of CCNE1 gene in NCI bladder cancer GWAS1 & GWAS2 samples (non-aggressive bladder cancer cases=1,870, controls=10,857).
Rank	Variant	bp	Source	Allele_1	Allele_2	IMPUTE2-score	r2 with rs8102137	MAF		p-val for HWE		Adjusted for covariates				Adjusted for covariates and rs8102137
								Cases	Controls	Cases	Controls	OR	95%CI_low	95%CI_upper	p-val	OR	95%CI_low	95%CI_upper	p-val
1	chr19:30327348:D	30327348	1KG	GA	G	0.91929	0.00186061	0.0027877	0.0035531	1	0.0079474	0.427013	0.24849	0.733792	0.0020664	0.432155	0.250833	0.744552	0.0025045
2	rs67183076	30273117	1KG	G	A	0.99062	0.156909	0.23108	0.25611	0.32827	0.39166	0.884706	0.806299	0.970737	0.0096746	0.887692	0.802331	0.982136	0.020922
3	rs10406613	30276911	GWAS	G	A	--	0.155675	0.23048	0.25601	0.39659	0.49642	0.887408	0.808923	0.973509	0.011466	0.890965	0.805565	0.985419	0.024724
4	rs11667347	30274623	GWAS	G	A	--	0.157456	0.23316	0.25762	0.33269	0.49818	0.888927	0.810629	0.974788	0.012322	0.892579	0.807271	0.986902	0.026606
5	rs7246015	30276514	1KG	C	T	0.99813	0.157202	0.23226	0.25662	0.33044	0.36508	0.891099	0.812457	0.977353	0.014449	0.895243	0.809545	0.990013	0.031116
6	rs67290013	30275213	1KG	C	G	0.98942	0.160869	0.23367	0.25901	0.30128	0.39518	0.891339	0.812621	0.977684	0.014755	0.895458	0.809571	0.990456	0.031836
7	rs66894626	30277486	1KG	A	T	0.99715	0.156908	0.23231	0.25665	0.32971	0.36509	0.891491	0.812771	0.977835	0.014884	0.895727	0.80994	0.9906	0.032038
8	rs11672936	30279370	1KG	G	A	0.98788	0.165535	0.23349	0.25641	0.36511	0.24691	0.895422	0.81608	0.982478	0.019622	0.900379	0.813704	0.996285	0.042158
9	rs78253220	30325829	1KG	C	T	0.92759	0.000102831	0	0.0010348	1	1	0.217795	0.0569721	0.832596	0.0259	0.22016	0.0574983	0.84299	0.027152
10	chr19:30273475:D	30273475	1KG	GTC	G	0.933	0.031767	0.12019	0.11119	0.18871	0.0047757	1.15775	1.0158	1.31954	0.028169	1.17613	1.0302	1.34273	0.016384
11	chr19:30326622:D	30326622	1KG	GGACA	G	0.93656	0.000102685	0	0.0010263	1	1	0.226027	0.0586063	0.87172	0.030828	0.228162	0.0590521	0.881558	0.032126
12	rs78022837	30326975	1KG	A	G	0.92312	0.000102685	0	0.0010392	1	1	0.226163	0.0584441	0.875188	0.031311	0.228367	0.0589167	0.885175	0.032641
13	rs11666333	30280567	1KG	C	T	0.9328	0.0364997	0.11978	0.11091	0.15347	0.0021222	1.1447	1.00472	1.30418	0.042283	1.16424	1.01991	1.32899	0.024322
14	rs13343418	30341395	1KG	A	G	0.92117	0.0027066	0.0067668	0.0055724	1	0.0042901	0.641735	0.418214	0.98472	0.042305	0.650886	0.423248	1.00096	0.050507
15	rs4805482	30299206	1KG	T	G	0.93921	0.0188506	0.046139	0.037761	0.79185	0.23193	1.20832	0.983605	1.48437	0.071462	1.23829	1.00502	1.5257	0.044749
16	rs118177621	30297329	1KG	G	C	0.98693	0.0314545	0.053422	0.059841	0.16724	0.66972	0.860544	0.724971	1.02147	0.085952	0.87143	0.732024	1.03738	0.12179
17	rs56115059	30343666	1KG	A	C	0.94129	0.498002	0.25889	0.25881	0.58723	0.079967	1.08308	0.984482	1.19155	0.10124	1.07799	0.944912	1.22981	0.26405
18	rs55930881	30343667	1KG	G	C	0.94129	0.498002	0.25889	0.25881	0.58723	0.079967	1.08307	0.984478	1.19155	0.10126	1.07799	0.944909	1.2298	0.26411
19	rs76075816	30300589	1KG	G	A	0.96015	0.018787	0.0443	0.036451	0.78132	0.21531	1.1884	0.965877	1.4622	0.10271	1.2175	0.986563	1.5025	0.066649
20	rs4334416	30287967	1KG	C	G	0.95652	0.411245	0.44737	0.4585	0.51264	0.26221	1.06961	0.984896	1.16161	0.10994	1.06084	0.954049	1.17959	0.27526
21	rs56184865	30343500	1KG	G	A	0.96497	0.511649	0.26647	0.26549	0.51574	0.12713	1.07918	0.982913	1.18488	0.10994	1.07231	0.94266	1.2198	0.28834
22	rs4804903	30293066	GWAS	T	C	--	0.260904	0.34305	0.35581	0.25936	0.48968	1.0689	0.982659	1.16271	0.12057	1.05643	0.958081	1.16487	0.27087
23	rs77319773	30321724	1KG	A	G	0.91722	0.00906111	0.037159	0.039831	0.51403	1	0.84686	0.686374	1.04487	0.12099	0.851224	0.689573	1.05077	0.13384
24	rs1473201	30290349	1KG	A	G	0.97983	0.402254	0.44394	0.45339	0.48259	0.40503	1.06677	0.982911	1.15779	0.12178	1.05665	0.951048	1.17397	0.3052
25	rs12460396	30325377	1KG	T	C	0.92167	0.00848979	0.036135	0.038671	0.51398	0.79577	0.846674	0.684866	1.04671	0.12402	0.850713	0.687824	1.05218	0.13597
26	rs62104504	30341864	1KG	G	A	0.97117	0.515919	0.26396	0.26422	0.5124	0.1669	1.07598	0.979961	1.18141	0.12465	1.06664	0.936634	1.21468	0.33069
27	rs16963425	30340724	1KG	G	A	0.97296	0.515851	0.26387	0.26415	0.5124	0.19062	1.0758	0.979849	1.18115	0.1253	1.06635	0.936405	1.21434	0.33257
28	rs80125410	30340694	1KG	A	G	0.973	0.515872	0.26387	0.26415	0.5124	0.19061	1.07579	0.979838	1.18113	0.12536	1.06633	0.936388	1.21431	0.33273
29	rs1862542	30328851	1KG	C	T	0.99677	0.115392	0.20797	0.20568	0.39904	0.052496	1.08024	0.977896	1.1933	0.12854	1.11699	1.00468	1.24186	0.040728
30	rs10421341	30308997	1KG	G	A	0.98722	0.169449	0.25881	0.25186	0.11663	0.036724	1.07312	0.979189	1.17607	0.13103	1.12024	1.01276	1.23912	0.027358
31	rs138512713	30323463	1KG	G	A	0.91777	0.00847218	0.036249	0.03877	0.51396	0.79655	0.849396	0.686826	1.05045	0.13208	0.853525	0.689841	1.05605	0.14484
32	rs7255959	30326564	1KG	C	T	0.99937	0.115645	0.20814	0.20559	0.39977	0.056128	1.07879	0.976806	1.19141	0.13445	1.11532	1.0034	1.23972	0.043083
33	rs12983296	30327352	1KG	G	C	0.99916	0.115645	0.20814	0.20566	0.39977	0.052478	1.07864	0.976675	1.19125	0.13513	1.11513	1.00324	1.2395	0.043386
34	rs11883361	30327503	1KG	C	T	0.99918	0.115645	0.20813	0.20567	0.39977	0.052496	1.07861	0.976651	1.19122	0.13526	1.1151	1.00321	1.23946	0.043441
35	rs16963431	30344536	1KG	C	T	0.9629	0.51105	0.2641	0.26492	0.67673	0.12049	1.07357	0.977611	1.17895	0.13727	1.06157	0.932923	1.20797	0.36466
36	rs4556910	30342679	1KG	A	T	0.97161	0.515632	0.26225	0.263	0.55024	0.13739	1.07284	0.977043	1.17802	0.14067	1.0606	0.931131	1.20807	0.37576
37	rs10418136	30326047	1KG	C	T	0.99864	0.115518	0.20781	0.20557	0.36099	0.059961	1.07753	0.975611	1.19009	0.14077	1.11384	1.00202	1.23814	0.045797
38	rs8104026	30316536	1KG	G	C	0.97365	0.118273	0.21177	0.20952	0.36829	0.059521	1.07784	0.975423	1.19101	0.14116	1.11512	1.00246	1.24044	0.044938
39	chr19:30325388:D	30325388	1KG	CA	C	0.99648	0.115578	0.208	0.20571	0.39904	0.06416	1.07732	0.975383	1.18991	0.14196	1.1137	1.00183	1.23807	0.046181
40	rs728427	30328212	GWAS	C	T	--	0.115264	0.20775	0.20577	0.39897	0.060166	1.07683	0.974986	1.1893	0.14423	1.11287	1.00119	1.237	0.047476
41	rs184184366	30323246	1KG	C	T	0.91646	0.00851055	0.036438	0.038858	0.51374	0.79698	0.854055	0.690431	1.05646	0.14596	0.858276	0.693517	1.06218	0.15991
42	rs79022614	30328803	1KG	G	A	0.92059	0.00835729	0.036575	0.038787	0.51373	0.79697	0.855012	0.691706	1.05687	0.14746	0.85904	0.694665	1.06231	0.16085
43	rs57894940	30293462	1KG	G	A	0.99037	0.991348	0.33703	0.32465	0.19549	0.072637	1.06327	0.975957	1.1584	0.16052	2.06611	0.968424	4.40802	0.060581
44	rs62104478	30295306	1KG	G	A	0.99468	0.991536	0.33719	0.32477	0.17868	0.079957	1.06263	0.975538	1.15749	0.16383	2.2399	0.984623	5.09549	0.054524
45	rs62104476	30294716	1KG	G	A	0.99331	0.991651	0.33699	0.32469	0.19549	0.072707	1.0623	0.975181	1.1572	0.16626	2.12648	0.944863	4.78581	0.068445
46	rs62107115	30289630	1KG	G	A	0.97755	0.990767	0.33519	0.32323	0.23261	0.043568	1.06269	0.974855	1.15845	0.16714	1.78886	0.873428	3.66376	0.11197
47	rs62104473	30289779	1KG	C	T	0.978	0.990783	0.33523	0.32326	0.23261	0.043568	1.06265	0.974837	1.15838	0.16731	1.79244	0.873138	3.67966	0.11187
48	rs12462504	30344208	1KG	T	C	0.91331	0.00695169	0.038299	0.039976	1	0.61689	0.864746	0.703044	1.06364	0.16889	0.868046	0.705465	1.0681	0.18107
49	rs8111487	30293267	1KG	C	T	0.9904	0.991203	0.3365	0.32448	0.21372	0.065922	1.06164	0.974466	1.15661	0.17121	1.8692	0.865153	4.03848	0.11165
50	chr19:30293460:D	30293460	1KG	AGG	A	0.99083	0.991222	0.33626	0.3244	0.21372	0.065891	1.06162	0.974456	1.15658	0.1713	1.97467	0.88239	4.41903	0.097964
51	rs62107111	30285548	1KG	C	T	0.96811	0.990864	0.3344	0.32268	0.27513	0.0237	1.06221	0.974025	1.15838	0.17232	1.54973	0.809843	2.96559	0.18608
52	rs17513613	30286822	1KG	T	C	0.97118	0.990909	0.33474	0.323	0.27508	0.026646	1.06202	0.973997	1.158	0.17284	1.59673	0.812856	3.13654	0.17433
53	rs111640872	30290357	1KG	G	C	0.98131	0.990949	0.33565	0.32379	0.23339	0.043739	1.06156	0.974005	1.15697	0.17374	1.73209	0.827136	3.62715	0.14539
54	rs79576418	30290890	1KG	A	G	0.98351	0.990977	0.33537	0.32361	0.23252	0.048466	1.06148	0.974015	1.15679	0.17387	1.82498	0.840559	3.96231	0.12898
55	rs17513752	30290811	1KG	A	G	0.9827	0.99097	0.33576	0.32388	0.23339	0.046134	1.06148	0.973993	1.15682	0.17398	1.74325	0.827469	3.67254	0.14398
56	rs36193392	30317537	1KG	C	T	0.92832	0.020471	0.058462	0.063101	0.83112	0.37071	0.887337	0.746506	1.05474	0.17521	0.895091	0.752178	1.06516	0.21175
57	rs62104477	30294991	1KG	G	T	0.97831	0.990906	0.33346	0.32112	0.14483	0.10802	1.06114	0.973148	1.1571	0.17903	1.54563	0.774006	3.08649	0.21795
58	rs10425066	30326294	GWAS	T	C	--	0.115448	0.20829	0.20664	0.40067	0.0695	1.07017	0.969209	1.18166	0.17978	1.10522	0.994525	1.22823	0.063152
59	rs116871382	30336763	1KG	C	T	0.92486	0.00827189	0.037261	0.039212	1	0.70069	0.871003	0.707147	1.07283	0.19399	0.874914	0.71003	1.07809	0.20976
Rank	Variant	bp	Source	Allele_1	Allele_2	IMPUTE2-score	r2 with rs8102137	MAF		p-val for HWE		Adjusted for covariates				Adjusted for covariates and rs8102137
								Cases	Controls	Cases	Controls	OR	95%CI_low	95%CI_upper	p-val	OR	95%CI_low	95%CI_upper	p-val
60	rs3218076	30315270	1KG	T	G	0.98269	0.168077	0.26015	0.25445	0.081276	0.04296	1.06254	0.969582	1.16442	0.19404	1.10575	1.00001	1.22266	0.049968
61	rs3218038	30305895	1KG	G	T	0.95743	0.0194012	0.045012	0.03786	0.78331	0.23279	1.14217	0.931929	1.39984	0.20025	1.16876	0.950785	1.4367	0.13866
62	rs10414632	30307003	1KG	T	C	0.94865	0.0197944	0.045271	0.038227	0.7853	0.18876	1.14022	0.930446	1.39728	0.20587	1.16682	0.949301	1.43417	0.14275
63	rs10422285	30309423	1KG	G	A	0.98361	0.168671	0.2606	0.2549	0.092796	0.05164	1.06067	0.968021	1.16219	0.20657	1.10393	0.998374	1.22064	0.053824
64	rs7248315	30280441	1KG	A	T	0.94398	0.308596	0.4348	0.42444	0.74175	0.18809	0.948671	0.873057	1.03083	0.21372	0.893517	0.80962	0.986107	0.025226
65	rs8103402	30319750	1KG	A	G	0.97956	0.119994	0.21004	0.20922	0.40229	0.059369	1.06501	0.964064	1.17653	0.21509	1.10033	0.989347	1.22377	0.077982
66	rs8102137	30296853	GWAS	T	C	--	--	0.33396	0.32339	0.17641	0.1957	1.05368	0.967342	1.14773	0.2306	--	--	--	--
67	rs62104483	30300017	1KG	G	A	0.98062	0.988025	0.33986	0.329	0.21568	0.25827	1.05387	0.96703	1.1485	0.23176	1.02066	0.564781	1.8445	0.94619
68	rs59868991	30297577	1KG	G	A	0.99772	0.998803	0.33442	0.3236	0.19385	0.15417	1.05325	0.966899	1.14732	0.23453	0.84847	0.142808	5.04105	0.85683
69	rs59592823	30297516	1KG	A	G	0.99755	0.998802	0.33443	0.32372	0.19385	0.14187	1.05318	0.966842	1.14724	0.2351	0.831029	0.143359	4.81736	0.83622
70	rs3218051	30310302	1KG	A	G	0.98781	0.261709	0.34764	0.35726	0.11383	0.53068	1.04995	0.965007	1.14237	0.25744	1.03115	0.934924	1.13728	0.5394
71	chr19:30323079:D	30323079	1KG	CTTTTCT	C	0.95506	0.268921	0.38835	0.39707	0.045797	0.2214	1.0482	0.963983	1.13977	0.27065	1.02973	0.935631	1.13329	0.5491
72	rs73038998	30331965	1KG	T	C	0.90527	0.00896198	0.15878	0.1638	0.068179	0.26214	0.939288	0.839493	1.05095	0.27443	0.942	0.841765	1.05417	0.29791
73	rs58989684	30299796	1KG	A	T	0.99323	0.998256	0.33471	0.32464	0.19385	0.18913	1.04857	0.962433	1.14241	0.27816	0.447638	0.148401	1.35026	0.15376
74	chr19:30304254:D	30304254	1KG	CAGTT	C	0.98279	0.973725	0.32997	0.32136	0.24981	0.13453	1.04855	0.961832	1.1431	0.28171	0.87973	0.554135	1.39664	0.58717
75	rs7247779	30297919	1KG	G	C	0.99626	0.997595	0.3343	0.32419	0.19385	0.17441	1.04797	0.961992	1.14163	0.28336	0.386548	0.123575	1.20914	0.1023
76	rs62104480	30298800	1KG	A	G	0.99546	0.997594	0.33432	0.32432	0.19393	0.18157	1.04717	0.961226	1.14081	0.29144	0.369524	0.123988	1.1013	0.073903
77	rs56400371	30299634	1KG	A	C	0.99494	0.99746	0.33433	0.32441	0.19393	0.18164	1.04686	0.960915	1.14049	0.29475	0.376036	0.130701	1.08188	0.06955
78	rs3218036	30305684	1KG	G	A	0.98618	0.976904	0.33122	0.32332	0.27289	0.14772	1.0466	0.960252	1.14072	0.29982	0.813386	0.496965	1.33127	0.41104
79	rs918586	30322427	1KG	A	G	0.99289	0.258984	0.37173	0.3816	0.037413	0.32899	1.04403	0.961077	1.13414	0.30769	1.02461	0.931755	1.12672	0.61595
80	rs79254467	30322927	1KG	G	T	0.90529	0.0255101	0.05861	0.050919	1	0.42619	1.09991	0.915527	1.32143	0.30904	1.12315	0.932256	1.35314	0.22174
81	rs78287840	30322929	1KG	G	T	0.90529	0.0255101	0.05861	0.050919	1	0.42619	1.09991	0.915524	1.32142	0.30907	1.12314	0.932246	1.35313	0.22176
82	rs8106054	30319896	1KG	C	G	0.98432	0.265528	0.37394	0.38276	0.047981	0.32958	1.04344	0.96017	1.13392	0.3163	1.02358	0.930259	1.12627	0.63267
83	rs12151208	30286245	1KG	A	G	0.9652	0.976601	0.33868	0.32682	0.21549	0.026086	1.04428	0.957744	1.13863	0.32623	0.830016	0.552001	1.24805	0.37066
84	rs76717523	30297143	1KG	C	T	0.91258	0.000551479	0.001611	0.00067827	1	1	1.84152	0.54043	6.27498	0.32898	1.88504	0.550499	6.45484	0.31275
85	rs11084196	30294146	1KG	C	T	0.98416	0.139599	0.2168	0.21781	0.49545	0.055375	1.04976	0.951845	1.15775	0.33101	1.08633	0.97722	1.20762	0.12521
86	chr19:30313523:D	30313523	1KG	CCTT	C	0.96391	0.964739	0.33186	0.32319	0.37564	0.072022	1.04387	0.956895	1.13875	0.3334	0.860278	0.599447	1.2346	0.41457
87	rs10417306	30295008	1KG	T	C	0.98554	0.13921	0.21665	0.21769	0.49545	0.058934	1.04947	0.951627	1.15738	0.33353	1.08607	0.977006	1.20731	0.12622
88	rs11671136	30295633	1KG	G	A	0.98659	0.13939	0.21654	0.21761	0.53886	0.062744	1.04921	0.951423	1.15705	0.33584	1.08582	0.976798	1.20702	0.12722
89	rs67237737	30302239	1KG	C	T	0.97038	0.135988	0.21636	0.21629	0.27511	0.014869	1.04936	0.951161	1.15769	0.3365	1.08536	0.976168	1.20677	0.13
90	chr19:30286037:I	30286037	1KG	G	GCCTGTAATC	0.96684	0.977004	0.33883	0.32715	0.21549	0.030874	1.04299	0.956646	1.13712	0.33974	0.806872	0.53581	1.21506	0.30354
91	rs2161516	30288488	1KG	C	T	0.96632	0.972544	0.3391	0.32761	0.21516	0.029329	1.0427	0.956342	1.13685	0.34317	0.820362	0.555605	1.21128	0.31918
92	rs11084229	30334417	1KG	C	A	0.95203	0.0749128	0.15165	0.15534	0.41838	0.40023	0.94771	0.847319	1.05999	0.34715	0.961946	0.856429	1.08046	0.51279
93	rs4805481	30294815	1KG	C	T	0.97904	0.137872	0.21584	0.21682	0.58389	0.062148	1.04824	0.950109	1.1565	0.34751	1.08474	0.975355	1.20639	0.13364
94	rs9653120	30319261	1KG	A	G	0.97664	0.239052	0.35316	0.36001	0.068539	0.34865	1.04123	0.956674	1.13327	0.34978	1.02119	0.927823	1.12394	0.66832
95	rs12971623	30333944	1KG	C	T	0.95798	0.073692	0.14996	0.1537	0.36264	0.46049	0.948049	0.8475	1.06053	0.351	0.962175	0.856594	1.08077	0.51557
96	rs144089374	30319519	1KG	G	A	0.91388	0.0517722	0.12144	0.11853	0.66448	0.58155	0.941863	0.829152	1.0699	0.35702	0.95439	0.837841	1.08715	0.48233
97	rs4805484	30320745	1KG	G	A	0.98869	0.263458	0.37416	0.38227	0.042951	0.34993	1.03963	0.956797	1.12963	0.3589	1.01865	0.925847	1.12076	0.70458
98	rs918588	30328941	1KG	A	G	0.99371	0.252609	0.37152	0.38078	0.04747	0.34919	1.03936	0.956735	1.12911	0.36103	1.01879	0.926711	1.12001	0.70012
99	rs8111686	30288177	1KG	G	A	0.94457	0.972842	0.33671	0.32393	0.17784	0.048623	1.04136	0.954132	1.13656	0.36389	0.804825	0.550829	1.17594	0.26225
100	rs1406	30315112	GWAS	C	A	--	0.136713	0.21417	0.21502	0.3359	0.099179	1.04568	0.948677	1.15259	0.36852	1.08049	0.972786	1.20012	0.14846
101	rs60560217	30288545	1KG	T	C	0.96835	0.97536	0.33783	0.32627	0.23422	0.042319	1.04034	0.954219	1.13423	0.36971	0.756026	0.499425	1.14447	0.18616
102	rs11668288	30295502	1KG	T	C	0.98434	0.140059	0.21749	0.21857	0.54032	0.067809	1.04562	0.948231	1.15301	0.37115	1.0817	0.973089	1.20244	0.14573
103	rs6509743	30336837	1KG	C	T	0.97516	0.0747356	0.15187	0.15604	0.36867	0.55971	0.951113	0.851436	1.06246	0.37488	0.965114	0.860563	1.08237	0.54386
104	chr19:30336883:D	30336883	1KG	CTT	C	0.97524	0.0747999	0.1519	0.15605	0.36867	0.55988	0.95133	0.85163	1.0627	0.37706	0.965352	0.860775	1.08264	0.54667
105	rs146454552	30293646	1KG	C	A	0.93207	0.00786702	0.017351	0.020419	1	1	0.873498	0.644181	1.18445	0.384	0.887373	0.652774	1.20628	0.4456
106	rs1107672	30279199	1KG	A	G	0.94744	0.258243	0.38892	0.38499	0.26324	0.37249	0.963208	0.88508	1.04823	0.38509	0.921535	0.836523	1.01519	0.097983
107	rs4805485	30326771	1KG	G	C	0.91802	0.0276986	0.060514	0.053214	1	0.39132	1.07897	0.902803	1.28951	0.40333	1.1009	0.918591	1.3194	0.29801
108	rs1811303	30325583	1KG	A	C	0.93989	0.172108	0.31506	0.30708	0.04708	0.030359	1.03758	0.950453	1.13269	0.4097	1.07179	0.973908	1.1795	0.15596
109	rs10406228	30327248	1KG	T	C	0.91707	0.0277458	0.060549	0.053254	1	0.39136	1.07783	0.901861	1.28813	0.40986	1.0997	0.917601	1.31794	0.30349
110	rs1961641	30328422	1KG	T	C	0.99586	0.252786	0.3735	0.38166	0.04795	0.38196	1.03459	0.952454	1.1238	0.42042	1.01264	0.921154	1.11321	0.79483
111	rs113701136	30277729	1KG	C	T	0.93876	0.917391	0.33088	0.3184	0.32146	0.028568	1.03672	0.949219	1.13228	0.42281	0.892597	0.696657	1.14365	0.36947
112	rs918587	30325256	GWAS	T	C	--	0.252502	0.3738	0.38215	0.053994	0.50247	1.03392	0.951941	1.12296	0.42869	1.01182	0.920505	1.11219	0.80767
113	rs7254392	30336114	1KG	C	G	0.96914	0.0751849	0.15349	0.1563	0.28369	0.5604	0.956865	0.856585	1.06888	0.43503	0.971562	0.866224	1.08971	0.62223
114	rs183457744	30277294	1KG	C	T	0.9201	0.00122027	0.0023428	0.0029692	1	1	0.753286	0.352677	1.60895	0.46434	0.763639	0.356628	1.63516	0.48758
115	rs180772063	30286301	1KG	A	T	0.90935	0.00122152	0.002393	0.0030054	1	1	0.761953	0.356253	1.62967	0.48336	0.772564	0.360281	1.65664	0.50733
116	rs10409876	30335047	1KG	A	G	0.97753	0.22986	0.40402	0.40657	0.21189	0.26538	1.02883	0.946904	1.11784	0.50201	1.00719	0.917968	1.10509	0.87971
117	rs113780919	30319203	1KG	G	A	0.93932	0.913864	0.3113	0.30804	0.28107	0.095748	1.03045	0.942084	1.1271	0.512	0.866026	0.683982	1.09652	0.23208
118	rs6509737	30331585	1KG	G	A	0.967	0.241377	0.40757	0.41095	0.23103	0.33134	1.02738	0.944885	1.11707	0.5271	1.00462	0.914437	1.10371	0.92358
119	rs929814	30340412	1KG	A	G	0.9859	0.206702	0.42163	0.4256	0.42021	1	1.02555	0.944632	1.11341	0.54737	1.00451	0.917152	1.1002	0.92266
Rank	Variant	bp	Source	Allele_1	Allele_2	IMPUTE2-score	r2 with rs8102137	MAF		p-val for HWE		Adjusted for covariates				Adjusted for covariates and rs8102137
								Cases	Controls	Cases	Controls	OR	95%CI_low	95%CI_upper	p-val	OR	95%CI_low	95%CI_upper	p-val
120	rs10500242	30328586	1KG	G	A	0.91021	0.0253661	0.057576	0.050793	0.83025	0.54841	1.05734	0.880992	1.26898	0.54923	1.07827	0.895922	1.29773	0.42531
121	rs3218026	30303138	1KG	C	A	0.91512	0.161178	0.23476	0.23598	0.36669	0.0084102	1.02986	0.933749	1.13586	0.55611	1.06642	0.957832	1.18732	0.24051
122	rs10408616	30334852	1KG	C	G	0.98069	0.224683	0.40702	0.40996	0.27014	0.37197	1.02508	0.943548	1.11366	0.55801	1.00299	0.914515	1.10003	0.94944
123	rs4805487	30337127	GWAS	A	C	--	0.201272	0.42005	0.42461	0.44776	0.81367	1.02435	0.94393	1.11163	0.56411	1.00338	0.916678	1.09829	0.94162
124	rs56285422	30319892	1KG	C	T	0.95915	0.915341	0.31536	0.31203	0.30884	0.085175	1.0263	0.939529	1.12109	0.56459	0.833601	0.65477	1.06128	0.13968
125	rs6509742	30336828	1KG	G	C	0.9963	0.202394	0.41954	0.42414	0.39267	0.98433	1.02414	0.943649	1.1115	0.56785	1.003	0.916152	1.09808	0.94833
126	rs11084238	30344435	1KG	C	T	0.95844	0.0545942	0.1046	0.10699	0.62077	0.36594	1.03886	0.907838	1.18879	0.5794	1.06494	0.926142	1.22454	0.37719
127	rs8100652	30324448	1KG	G	C	0.96575	0.17976	0.30798	0.30199	0.057384	0.0619	1.02304	0.937637	1.11623	0.60848	1.05431	0.958376	1.15984	0.27726
128	rs56027477	30298412	1KG	C	A	0.95867	0.0598102	0.11298	0.11512	0.0035471	0.60424	0.969607	0.854641	1.10004	0.63172	0.989095	0.867213	1.12811	0.87018
129	rs117977791	30337645	1KG	C	T	0.99178	0.0584473	0.10828	0.11089	0.547	0.80762	1.02871	0.902923	1.17203	0.67053	1.05313	0.920029	1.20549	0.45269
130	rs997669	30304483	GWAS	T	C	--	0.75877	0.39144	0.38703	0.33162	0.30227	1.01651	0.936522	1.10334	0.6953	0.892044	0.754362	1.05485	0.18166
131	rs7250389	30325332	1KG	G	T	0.96953	0.880863	0.31759	0.31519	0.28578	0.11438	1.01761	0.932255	1.11078	0.69611	0.819984	0.658562	1.02097	0.076066
132	rs12982841	30331915	1KG	G	A	0.96584	0.0582566	0.10625	0.11034	0.62468	0.76921	1.02647	0.898507	1.17266	0.70054	1.0507	0.915443	1.20594	0.48178
133	rs7250406	30325379	1KG	G	A	0.9691	0.881002	0.3181	0.31559	0.26271	0.13083	1.0166	0.931304	1.1097	0.71273	0.815707	0.65541	1.01521	0.068055
134	rs4805486	30327200	1KG	C	A	0.95863	0.183854	0.31162	0.30674	0.07542	0.090506	1.01649	0.931643	1.10907	0.71297	1.04677	0.951321	1.15179	0.3488
135	rs17599450	30328753	1KG	C	T	0.96732	0.877407	0.31791	0.31556	0.26285	0.13081	1.01659	0.9312	1.10982	0.71316	0.822736	0.663706	1.01987	0.075033
136	rs56313825	30300841	1KG	G	A	0.98606	0.808948	0.38768	0.38384	0.35471	0.22349	1.01538	0.934909	1.10277	0.71715	0.872956	0.730985	1.0425	0.13353
137	rs7257694	30314666	1KG	C	T	0.97957	0.766238	0.38674	0.38256	0.55854	0.20058	1.01535	0.934655	1.10302	0.71839	0.888723	0.751527	1.05096	0.16805
138	rs12460611	30326600	1KG	A	G	0.96947	0.878011	0.31802	0.31563	0.26269	0.13659	1.01607	0.930827	1.10912	0.72135	0.817234	0.658196	1.0147	0.06758
139	rs7250914	30325682	1KG	G	A	0.96931	0.878215	0.31796	0.31558	0.26285	0.13083	1.01604	0.930798	1.1091	0.72182	0.814802	0.655389	1.01299	0.065269
140	rs3218069	30313576	1KG	C	T	0.9796	0.76626	0.3877	0.3833	0.62595	0.16744	1.01503	0.934425	1.10258	0.72385	0.887373	0.75033	1.04945	0.16268
141	rs114270658	30333745	1KG	C	T	0.90063	0.000100885	0.00054118	0.00041646	1	1	0.757941	0.156246	3.67672	0.73086	0.769519	0.157796	3.75269	0.74587
142	rs3218070	30313603	1KG	C	G	0.97996	0.767186	0.3867	0.38288	0.55854	0.18681	1.01327	0.932781	1.10071	0.75487	0.880144	0.743772	1.04152	0.1372
143	rs147273499	30325292	1KG	C	G	0.91803	0.000100871	0.00054011	0.00040725	1	1	0.779034	0.160299	3.78602	0.7569	0.7905	0.161749	3.86333	0.7715
144	rs75996259	30302546	1KG	C	T	0.90122	0.71512	0.40415	0.39994	0.50143	0.09302	1.01357	0.930608	1.10393	0.75705	0.910352	0.78202	1.05974	0.2255
145	rs7257330	30301823	1KG	G	A	0.99606	0.767193	0.39049	0.38689	0.33085	0.2406	1.01181	0.932111	1.09832	0.77913	0.872275	0.736452	1.03315	0.11354
146	rs4804905	30338472	1KG	A	G	0.99714	0.0624955	0.11193	0.11542	0.55954	0.74202	0.982165	0.865614	1.11441	0.78007	1.00217	0.878957	1.14266	0.97416
147	rs148060160	30324195	1KG	G	C	0.90364	0.00275237	0.013621	0.014455	0.0037806	0.72983	1.05151	0.736685	1.50087	0.78205	1.05902	0.741338	1.51283	0.75266
148	rs929813	30340381	1KG	C	T	0.98781	0.0630025	0.11647	0.11835	0.65276	1	0.985129	0.869471	1.11617	0.8141	1.00489	0.882775	1.14389	0.9412
149	rs10408388	30341427	1KG	T	C	0.9852	0.062963	0.11648	0.11834	0.65276	1	0.985433	0.869583	1.11672	0.81812	1.00528	0.882939	1.14457	0.93665
150	rs10402908	30341553	1KG	A	G	0.98489	0.062965	0.11647	0.11835	0.65276	1	0.985441	0.869573	1.11675	0.81824	1.00529	0.882933	1.14461	0.93649
151	rs143221530	30278131	1KG	A	G	0.90323	7.38e-05	0.00056952	0.00041383	1	1	0.838811	0.169551	4.1498	0.8294	0.851343	0.171079	4.23656	0.84416
152	rs8110447	30330444	GWAS	G	A	--	0.357985	0.47219	0.47126	0.13775	0.98464	1.00887	0.930603	1.09371	0.83033	1.05818	0.958185	1.16861	0.26417
153	chr19:30321864:I	30321864	1KG	A	AT	0.97133	0.797036	0.35505	0.35521	0.4795	0.16035	0.991464	0.910917	1.07913	0.84281	0.799507	0.672568	0.950404	0.011204
154	rs1862541	30322301	GWAS	G	T	--	0.0579766	0.1115	0.11311	0.0006094	0.70185	0.988957	0.873112	1.12017	0.86133	1.00854	0.886412	1.1475	0.89723
155	chr19:30303379:D	30303379	1KG	GA	G	0.96106	0.717755	0.40424	0.40615	0.77327	0.29164	0.992871	0.914202	1.07831	0.8651	0.847495	0.728644	0.985733	0.031831
156	rs34331990	30321561	1KG	T	G	0.98621	0.634623	0.4162	0.40906	0.56773	0.34067	0.994148	0.915984	1.07898	0.88827	0.898903	0.791516	1.02086	0.10063
157	rs735319	30339140	GWAS	A	G	--	0.0634727	0.11578	0.11707	0.65125	0.96299	0.994418	0.877725	1.12663	0.92996	1.01548	0.891993	1.15605	0.81642
158	rs4805483	30314459	1KG	A	G	0.96612	0.0628805	0.10824	0.11555	0.72013	0.34734	0.995337	0.872672	1.13524	0.94447	1.01777	0.887746	1.16684	0.80059
159	rs3218027	30303352	1KG	T	C	0.91278	0.729045	0.39213	0.38683	0.28577	0.51734	1.003	0.920466	1.09294	0.94542	0.868515	0.740888	1.01813	0.082052
160	rs79185930	30344619	1KG	T	G	0.95173	0.0600636	0.11431	0.11512	0.49348	0.50933	1.00304	0.882284	1.14033	0.96299	1.02582	0.897755	1.17215	0.70787
161	chr19:30314457:I	30314457	1KG	A	AG	0.93815	0.0559509	0.1054	0.11132	1	0.52802	0.997931	0.871902	1.14218	0.97601	1.02117	0.887514	1.17496	0.76969
162	rs182489308	30283001	1KG	A	G	1		0	0	1	1
163	rs187849648	30287137	1KG	A	T	1		0	0	1	1

## Sheet: GWAS12-Aggressive
Supplementary Table 5-2. Association results for +/− 30 Kb region of CCNE1 gene in NCI bladder cancer GWAS1 & GWAS2 samples (aggressive bladder cancer cases=1,930, controls=10,857).
Rank	Variant	bp	Source	Allele_1	Allele_2	IMPUTE2-score	r2 with rs8102137	MAF		p-val for HWE		Adjusted for covariates				Adjusted for covariates and rs8102137
								Cases	Controls	Cases	Controls	OR	95%CI_low	95%CI_upper	p-val	OR	95%CI_low	95%CI_upper	p-val
1	rs75996259	30302546	1KG	C	T	0.90108	0.71512	0.44497	0.39994	0.28906	0.09302	1.20051	1.10705	1.30187	9.906e-06	1.13561	0.983044	1.31185	0.083984
2	chr19:30293460:D	30293460	1KG	AGG	A	0.99093	0.991222	0.36762	0.3244	0.6243	0.065891	1.19038	1.09832	1.29015	2.1988e-05	1.37005	0.609211	3.08111	0.44735
3	rs8111487	30293267	1KG	C	T	0.99041	0.991203	0.36797	0.32448	0.65943	0.065922	1.19001	1.09797	1.28976	2.2761e-05	1.2965	0.604296	2.78161	0.50497
4	rs57894940	30293462	1KG	G	A	0.99043	0.991348	0.36808	0.32465	0.65943	0.072637	1.1899	1.09788	1.28964	2.2976e-05	1.28911	0.598675	2.7758	0.51698
5	rs79576418	30290890	1KG	A	G	0.98358	0.990977	0.36664	0.32361	0.65897	0.048466	1.19058	1.09817	1.29076	2.3162e-05	1.27462	0.594447	2.73306	0.53364
6	rs56313825	30300841	1KG	G	A	0.9861	0.808948	0.42843	0.38384	0.20933	0.22349	1.18327	1.09426	1.27951	2.468e-05	1.1016	0.931879	1.30224	0.25695
7	rs17513752	30290811	1KG	A	G	0.98272	0.99097	0.36706	0.32388	0.65929	0.046134	1.18987	1.0975	1.29	2.4799e-05	1.19255	0.578222	2.45955	0.63393
8	rs62104476	30294716	1KG	G	A	0.99337	0.991651	0.36814	0.32469	0.62465	0.072707	1.18876	1.09694	1.28826	2.486e-05	1.21552	0.55061	2.68336	0.62975
9	rs111640872	30290357	1KG	G	C	0.98133	0.990949	0.36689	0.32379	0.65929	0.043739	1.18983	1.0974	1.29004	2.5208e-05	1.17501	0.57478	2.40206	0.65812
10	rs62104478	30295306	1KG	G	A	0.99474	0.991536	0.3682	0.32477	0.59014	0.079957	1.18825	1.09653	1.28764	2.5726e-05	1.18084	0.530768	2.62713	0.68427
11	rs62104473	30289779	1KG	C	T	0.9779	0.990783	0.36614	0.32326	0.62394	0.043568	1.18995	1.09732	1.2904	2.5985e-05	1.14446	0.573628	2.28333	0.70207
12	rs62107115	30289630	1KG	G	A	0.97745	0.990767	0.36608	0.32323	0.62394	0.043568	1.18991	1.09727	1.29038	2.6162e-05	1.1389	0.572578	2.26534	0.71159
13	rs8102137	30296853	GWAS	T	C	--	--	0.36632	0.32339	0.52387	0.1957	1.18743	1.09571	1.28682	2.8058e-05	--	--	--	--
14	rs7257330	30301823	1KG	G	A	0.99621	0.767193	0.43149	0.38689	0.164	0.2406	1.18041	1.09214	1.27581	2.8806e-05	1.09448	0.932946	1.28397	0.26783
15	rs17513613	30286822	1KG	T	C	0.97123	0.990909	0.36554	0.323	0.65896	0.026646	1.18919	1.09636	1.28988	2.9347e-05	1.05845	0.561547	1.99505	0.8612
16	rs62104477	30294991	1KG	G	T	0.97803	0.990906	0.36404	0.32112	0.62287	0.10802	1.18906	1.09617	1.28982	3.0132e-05	1.03781	0.536915	2.00601	0.9112
17	rs62107111	30285548	1KG	C	T	0.96822	0.990864	0.365	0.32268	0.6586	0.0237	1.18864	1.09571	1.28945	3.1719e-05	1.01898	0.557994	1.86081	0.95129
18	rs997669	30304483	GWAS	T	C	--	0.75877	0.43083	0.38703	0.13766	0.30227	1.17891	1.09078	1.27416	3.2991e-05	1.08895	0.929309	1.27602	0.29207
19	chr19:30313523:D	30313523	1KG	CCTT	C	0.96362	0.964739	0.36376	0.32319	1	0.072022	1.18864	1.09527	1.28997	3.4686e-05	1.05052	0.739439	1.49249	0.78232
20	rs58989684	30299796	1KG	A	T	0.99346	0.998256	0.36753	0.32464	0.49291	0.18913	1.18555	1.09375	1.28507	3.4877e-05	0.803113	0.299744	2.1518	0.66245
21	rs7247779	30297919	1KG	G	C	0.9963	0.997595	0.36746	0.32419	0.49289	0.17441	1.18525	1.09357	1.2846	3.5052e-05	0.815601	0.31593	2.10555	0.67329
22	rs59868991	30297577	1KG	G	A	0.99777	0.998803	0.36634	0.3236	0.556	0.15417	1.18472	1.09319	1.28392	3.6018e-05	0.532368	0.130558	2.1708	0.37951
23	rs59592823	30297516	1KG	A	G	0.99754	0.998802	0.36643	0.32372	0.556	0.14187	1.18465	1.09313	1.28383	3.613e-05	0.541323	0.136018	2.15436	0.38372
24	rs62104480	30298800	1KG	A	G	0.99558	0.997594	0.36749	0.32432	0.49289	0.18157	1.18487	1.09319	1.28423	3.6502e-05	0.791441	0.316561	1.9787	0.61673
25	rs56400371	30299634	1KG	A	C	0.99511	0.99746	0.36752	0.32441	0.49289	0.18164	1.18487	1.09317	1.28426	3.6669e-05	0.801116	0.328526	1.95353	0.62554
26	rs80125410	30340694	1KG	A	G	0.97338	0.515872	0.29017	0.26415	0.58047	0.19061	1.19915	1.09915	1.30824	4.3524e-05	1.10271	0.976701	1.24498	0.11429
27	rs16963425	30340724	1KG	G	A	0.97334	0.515851	0.29017	0.26415	0.58047	0.19062	1.19913	1.09914	1.30823	4.3557e-05	1.1027	0.976691	1.24496	0.11434
28	rs7257694	30314666	1KG	C	T	0.97918	0.766238	0.42483	0.38256	0.32808	0.20058	1.17788	1.08892	1.27411	4.382e-05	1.07813	0.919646	1.26393	0.3536
29	rs62104504	30341864	1KG	G	A	0.97156	0.515919	0.2902	0.26422	0.58047	0.1669	1.19912	1.09907	1.30828	4.4048e-05	1.10253	0.976528	1.24479	0.11492
30	rs4556910	30342679	1KG	A	T	0.97201	0.515632	0.28906	0.263	0.50601	0.13739	1.19891	1.09883	1.3081	4.5203e-05	1.10185	0.975765	1.24422	0.1177
31	rs3218069	30313576	1KG	C	T	0.97934	0.76626	0.42561	0.3833	0.40193	0.16744	1.17655	1.08778	1.27258	4.8675e-05	1.07364	0.915621	1.25894	0.38159
32	rs3218070	30313603	1KG	C	G	0.97964	0.767186	0.42506	0.38288	0.35146	0.18681	1.17637	1.08758	1.2724	4.978e-05	1.07264	0.914414	1.25824	0.38914
33	chr19:30304254:D	30304254	1KG	CAGTT	C	0.98265	0.973725	0.36141	0.32136	0.58749	0.13453	1.18268	1.09034	1.28283	5.2234e-05	0.918905	0.595555	1.41782	0.70238
34	rs56115059	30343666	1KG	A	C	0.94138	0.498002	0.28365	0.25881	0.57559	0.079967	1.20184	1.0994	1.31381	5.2272e-05	1.10128	0.973716	1.24556	0.12453
35	rs55930881	30343667	1KG	G	C	0.94138	0.498002	0.28365	0.25881	0.57559	0.079967	1.20184	1.0994	1.31381	5.228e-05	1.10127	0.973706	1.24555	0.12454
36	rs56184865	30343500	1KG	G	A	0.96528	0.511649	0.29147	0.26549	0.5813	0.12713	1.19634	1.09646	1.30532	5.5646e-05	1.09796	0.973125	1.23881	0.12912
37	rs16963431	30344536	1KG	C	T	0.9633	0.51105	0.29032	0.26492	0.54361	0.12049	1.19598	1.09597	1.30513	5.8969e-05	1.09703	0.972413	1.23762	0.13227
38	rs3218036	30305684	1KG	G	A	0.98633	0.976904	0.36308	0.32332	0.55501	0.14772	1.18051	1.08866	1.28012	5.9293e-05	0.856861	0.536071	1.36961	0.51827
39	chr19:30303379:D	30303379	1KG	GA	G	0.96114	0.717755	0.44696	0.40615	0.33331	0.29164	1.17429	1.08569	1.27011	5.9684e-05	1.07231	0.927517	1.2397	0.34559
40	rs8111686	30288177	1KG	G	A	0.94403	0.972842	0.36795	0.32393	0.96095	0.048623	1.1821	1.08884	1.28334	6.6091e-05	0.928733	0.647071	1.333	0.68818
41	rs62104483	30300017	1KG	G	A	0.98187	0.988025	0.37034	0.329	0.52611	0.25827	1.17672	1.08553	1.27557	7.6814e-05	0.737809	0.44133	1.23346	0.24618
42	rs2161516	30288488	1KG	C	T	0.9661	0.972544	0.37034	0.32761	0.66019	0.029329	1.1751	1.08339	1.27457	9.9503e-05	0.832593	0.568785	1.21876	0.34636
43	rs12151208	30286245	1KG	A	G	0.96513	0.976601	0.36947	0.32682	0.65996	0.026086	1.17404	1.08242	1.27341	0.00010859	0.795225	0.534249	1.18368	0.25867
44	chr19:30286037:I	30286037	1KG	G	GCCTGTAATC	0.96669	0.977004	0.36972	0.32715	0.69588	0.030874	1.17344	1.08193	1.27269	0.00011296	0.784264	0.525555	1.17032	0.23376
45	rs60560217	30288545	1KG	T	C	0.96812	0.97536	0.36889	0.32627	0.69567	0.042319	1.17336	1.08183	1.27264	0.00011435	0.774777	0.516528	1.16214	0.21765
46	rs56285422	30319892	1KG	C	T	0.95901	0.915341	0.34933	0.31203	0.96004	0.085175	1.1766	1.08304	1.27825	0.00011959	0.971117	0.766441	1.23045	0.80874
47	rs113701136	30277729	1KG	C	T	0.93926	0.917391	0.36227	0.3184	0.69345	0.028568	1.17372	1.08084	1.27459	0.00014007	0.970172	0.774419	1.21541	0.79237
48	rs7250389	30325332	1KG	G	T	0.96941	0.880863	0.35239	0.31519	1	0.11438	1.17275	1.08029	1.27312	0.00014284	0.980545	0.792175	1.21371	0.85687
49	rs7250406	30325379	1KG	G	A	0.96902	0.881002	0.35281	0.31559	1	0.13083	1.1721	1.07968	1.27244	0.00015116	0.977498	0.790255	1.20911	0.83386
50	rs17599450	30328753	1KG	C	T	0.96718	0.877407	0.35244	0.31556	1	0.13081	1.17234	1.07974	1.27287	0.00015206	0.982214	0.797577	1.20959	0.86569
51	rs12460611	30326600	1KG	A	G	0.96927	0.878011	0.35282	0.31563	1	0.13659	1.17197	1.07954	1.27233	0.00015322	0.979092	0.79333	1.20835	0.84385
52	rs7250914	30325682	1KG	G	A	0.96917	0.878215	0.35278	0.31558	1	0.13083	1.17178	1.07936	1.2721	0.00015547	0.976753	0.790505	1.20688	0.82788
53	rs113780919	30319203	1KG	G	A	0.93837	0.913864	0.34335	0.30804	1	0.095748	1.17617	1.08112	1.27957	0.00016044	0.955426	0.757434	1.20517	0.70028
54	chr19:30321864:I	30321864	1KG	A	AT	0.97111	0.797036	0.39614	0.35521	0.63411	0.16035	1.16354	1.07421	1.2603	0.00020204	1.01014	0.856642	1.19114	0.90457
55	rs3218027	30303352	1KG	T	C	0.91263	0.729045	0.42618	0.38683	0.37624	0.51734	1.16103	1.07029	1.25947	0.00032303	1.012	0.870624	1.17633	0.87659
56	rs6509742	30336828	1KG	G	C	0.9965	0.202394	0.45124	0.42414	0.61289	0.98433	1.12782	1.04382	1.21859	0.002318	1.0635	0.976348	1.15843	0.15814
57	rs4805487	30337127	GWAS	A	C	--	0.201272	0.45155	0.42461	0.6134	0.81367	1.12711	1.04321	1.21776	0.0024307	1.06284	0.975828	1.15762	0.16195
58	rs929814	30340412	1KG	A	G	0.9862	0.206702	0.45242	0.4256	0.64581	1	1.12657	1.04232	1.21764	0.002655	1.0614	0.973987	1.15666	0.17416
59	rs6509737	30331585	1KG	G	A	0.96728	0.241377	0.43832	0.41095	0.54807	0.33134	1.1271	1.0416	1.21962	0.0029537	1.05604	0.966537	1.15384	0.22758
60	rs4804903	30293066	GWAS	T	C	--	0.260904	0.32332	0.35581	0.79495	0.48968	1.12536	1.03807	1.21998	0.0041441	1.04311	0.948609	1.14703	0.3837
61	rs1473201	30290349	1KG	A	G	0.97938	0.402254	0.42239	0.45339	0.3753	0.40503	1.11964	1.03537	1.21078	0.0046473	1.01291	0.914452	1.12196	0.80591
62	rs10409876	30335047	1KG	A	G	0.97771	0.22986	0.43262	0.40657	0.3074	0.26538	1.11784	1.03365	1.20889	0.0052956	1.04719	0.959457	1.14295	0.30169
Rank	Variant	bp	Source	Allele_1	Allele_2	IMPUTE2-score	r2 with rs8102137	MAF		p-val for HWE		Adjusted for covariates				Adjusted for covariates and rs8102137
								Cases	Controls	Cases	Controls	OR	95%CI_low	95%CI_upper	p-val	OR	95%CI_low	95%CI_upper	p-val
63	rs10408616	30334852	1KG	C	G	0.98102	0.224683	0.43535	0.40996	0.37909	0.37197	1.1142	1.03038	1.20485	0.0067304	1.04398	0.956869	1.13903	0.33289
64	rs34331990	30321561	1KG	T	G	0.98604	0.634623	0.44641	0.40906	0.71257	0.34067	1.10836	1.02563	1.19776	0.0093328	0.934357	0.824725	1.05856	0.2863
65	rs4334416	30287967	1KG	C	G	0.95576	0.411245	0.42909	0.4585	0.42961	0.26221	1.1101	1.02582	1.20131	0.0095186	0.996274	0.898546	1.10463	0.94379
66	chr19:30323079:D	30323079	1KG	CTTTTCT	C	0.95584	0.268921	0.36676	0.39707	0.8446	0.2214	1.11013	1.0245	1.20292	0.010737	1.02669	0.935098	1.12725	0.58063
67	rs3218051	30310302	1KG	A	G	0.98755	0.261709	0.32799	0.35726	0.75679	0.53068	1.10941	1.0229	1.20324	0.01219	1.02228	0.929251	1.12462	0.65081
68	chr19:30327348:D	30327348	1KG	GA	G	0.91901	0.00186061	0.0033404	0.0035531	1	0.0079474	0.547042	0.321599	0.93052	0.026036	0.576725	0.336402	0.988733	0.04537
69	rs9653120	30319261	1KG	A	G	0.97669	0.239052	0.33386	0.36001	0.50606	0.34865	1.09526	1.00949	1.18831	0.028733	1.01156	0.92122	1.11077	0.80955
70	rs8106054	30319896	1KG	C	G	0.98467	0.265528	0.35467	0.38276	0.8423	0.32958	1.09235	1.00856	1.18311	0.030064	1.00401	0.914587	1.10219	0.93289
71	rs4805484	30320745	1KG	G	A	0.98906	0.263458	0.35425	0.38227	0.8813	0.34993	1.09165	1.00804	1.18218	0.031001	1.00305	0.913784	1.10104	0.94896
72	rs7248315	30280441	1KG	A	T	0.94394	0.308596	0.40127	0.42444	0.77615	0.18809	1.08998	1.00731	1.17943	0.032273	0.992285	0.902402	1.09112	0.87308
73	rs918586	30322427	1KG	A	G	0.99306	0.258984	0.35341	0.3816	0.92059	0.32899	1.08961	1.00635	1.17977	0.034348	1.00148	0.912727	1.09886	0.97522
74	rs1961641	30328422	1KG	T	C	0.99591	0.252786	0.3537	0.38166	0.8033	0.38196	1.08846	1.00533	1.17848	0.036523	1.001	0.91256	1.098	0.98321
75	rs8110447	30330444	GWAS	G	A	--	0.357985	0.44197	0.47126	1	0.98464	0.921458	0.853006	0.995403	0.037805	1.02383	0.929758	1.12741	0.63202
76	rs918588	30328941	1KG	A	G	0.99395	0.252609	0.35296	0.38078	0.80314	0.34919	1.08782	1.00468	1.17784	0.037984	1.00031	0.911921	1.09726	0.99477
77	rs918587	30325256	GWAS	T	C	--	0.252502	0.3544	0.38215	0.76539	0.50247	1.08572	1.00291	1.17536	0.042181	0.997701	0.909674	1.09425	0.96104
78	rs78253220	30325829	1KG	C	T	0.92156	0.000102831	0	0.0010348	1	1	0.275987	0.0737707	1.03251	0.055821	0.282014	0.0743077	1.0703	0.062853
79	rs4805486	30327200	1KG	C	A	0.95822	0.183854	0.29579	0.30674	0.95641	0.090506	0.923172	0.848996	1.00383	0.061397	0.994503	0.90579	1.0919	0.90789
80	rs67183076	30273117	1KG	G	A	0.99067	0.156909	0.23476	0.25611	0.28071	0.39166	0.919248	0.841398	1.0043	0.062195	0.988543	0.896601	1.08991	0.81703
81	rs11667347	30274623	GWAS	G	A	--	0.157456	0.23627	0.25762	0.28411	0.49818	0.919943	0.842512	1.00449	0.062864	0.98885	0.897454	1.08955	0.82072
82	rs67290013	30275213	1KG	C	G	0.98929	0.160869	0.2367	0.25901	0.3444	0.39518	0.919879	0.842251	1.00466	0.063367	0.989763	0.89789	1.09104	0.83601
83	chr19:30326622:D	30326622	1KG	GGACA	G	0.93015	0.000102685	0	0.0010263	1	1	0.286562	0.0761617	1.0782	0.064516	0.291767	0.0764089	1.11411	0.071561
84	rs78022837	30326975	1KG	A	G	0.91632	0.000102685	0.0001044	0.0010392	1	1	0.288691	0.0766807	1.08687	0.066232	0.29411	0.0770151	1.12317	0.07344
85	rs10406613	30276911	GWAS	G	A	--	0.155675	0.23394	0.25601	0.25274	0.49642	0.921271	0.843434	1.00629	0.068644	0.990164	0.898446	1.09125	0.84202
86	rs66894626	30277486	1KG	A	T	0.99712	0.156908	0.23538	0.25665	0.31093	0.36509	0.921979	0.844188	1.00694	0.07088	0.991755	0.89986	1.09304	0.86745
87	rs7246015	30276514	1KG	C	T	0.99805	0.157202	0.23538	0.25662	0.3109	0.36508	0.922261	0.844483	1.0072	0.071811	0.991978	0.900126	1.0932	0.87095
88	rs11672936	30279370	1KG	G	A	0.98798	0.165535	0.23586	0.25641	0.34288	0.24691	0.923281	0.845201	1.00857	0.076621	0.994618	0.902052	1.09668	0.9138
89	rs10500242	30328586	1KG	G	A	0.90617	0.0253661	0.047866	0.050793	0.19843	0.54841	0.851445	0.71134	1.01915	0.079562	0.896148	0.745529	1.0772	0.24285
90	rs3218026	30303138	1KG	C	A	0.91639	0.161178	0.22003	0.23598	0.38791	0.0084102	0.921309	0.839226	1.01142	0.085159	1.00053	0.901652	1.11024	0.99208
91	rs8100652	30324448	1KG	G	C	0.96521	0.17976	0.29249	0.30199	0.82581	0.0619	0.930201	0.85543	1.01151	0.09057	1.0031	0.913754	1.10118	0.94812
92	rs3218038	30305895	1KG	G	T	0.95567	0.0194012	0.033667	0.03786	0.47165	0.23279	0.838912	0.684157	1.02867	0.091336	0.886832	0.719659	1.09284	0.25976
93	rs56027477	30298412	1KG	C	A	0.95902	0.0598102	0.1058	0.11512	0.8098	0.60424	0.900703	0.797023	1.01787	0.093722	0.960807	0.84494	1.09256	0.542
94	rs10414632	30307003	1KG	T	C	0.94567	0.0197944	0.034204	0.038227	0.48288	0.18876	0.840936	0.686009	1.03085	0.095408	0.889425	0.721934	1.09578	0.27097
95	rs13343418	30341395	1KG	A	G	0.92286	0.0027066	0.0067974	0.0055724	0.081306	0.0042901	0.700907	0.460868	1.06597	0.096652	0.742502	0.485441	1.13569	0.16971
96	rs10422285	30309423	1KG	G	A	0.98315	0.168671	0.24135	0.2549	0.66309	0.05164	0.930827	0.852426	1.01644	0.11031	1.00876	0.914381	1.11288	0.86184
97	rs10406228	30327248	1KG	T	C	0.91348	0.0277458	0.050284	0.053254	0.14323	0.39136	0.866667	0.727052	1.03309	0.11032	0.912355	0.762234	1.09204	0.31729
98	rs1811303	30325583	1KG	A	C	0.93896	0.172108	0.29805	0.30708	0.74416	0.030359	0.933547	0.857962	1.01579	0.11041	1.0067	0.916708	1.10553	0.8888
99	rs4805485	30326771	1KG	G	C	0.91448	0.0276986	0.050262	0.053214	0.14309	0.39132	0.867656	0.727877	1.03428	0.11321	0.913462	0.763153	1.09337	0.32376
100	rs78287840	30322929	1KG	G	T	0.90106	0.0255101	0.048111	0.050919	0.19843	0.42619	0.870002	0.725693	1.04301	0.13233	0.916563	0.761353	1.10341	0.35736
101	rs79254467	30322927	1KG	G	T	0.90106	0.0255101	0.048111	0.050919	0.19843	0.42619	0.870002	0.725693	1.04301	0.13235	0.916568	0.761356	1.10342	0.35739
102	rs76075816	30300589	1KG	G	A	0.95949	0.018787	0.032595	0.036451	0.45115	0.21531	0.85309	0.692998	1.05017	0.13404	0.902398	0.729398	1.11643	0.34427
103	rs3218076	30315270	1KG	T	G	0.98201	0.168077	0.2418	0.25445	0.70926	0.04296	0.93555	0.856673	1.02169	0.1382	1.0145	0.919645	1.11915	0.77373
104	rs10421341	30308997	1KG	G	A	0.98704	0.169449	0.23827	0.25186	0.53064	0.036724	0.935524	0.856557	1.02177	0.13853	1.01607	0.920643	1.12139	0.75138
105	rs1107672	30279199	1KG	A	G	0.94741	0.258243	0.36571	0.38499	0.58929	0.37249	1.06143	0.979546	1.15017	0.14553	0.966631	0.880484	1.06121	0.47615
106	rs1862541	30322301	GWAS	G	T	--	0.0579766	0.10492	0.11311	0.8089	0.70185	0.921193	0.81631	1.03955	0.18317	0.979926	0.863602	1.11192	0.75312
107	rs144089374	30319519	1KG	G	A	0.91316	0.0517722	0.11787	0.11853	0.18694	0.58155	0.922334	0.816868	1.04142	0.19191	0.971346	0.856812	1.10119	0.64969
108	rs148060160	30324195	1KG	G	C	0.90623	0.00275237	0.01577	0.014455	1	0.72983	1.25272	0.892735	1.75788	0.19237	1.31013	0.930104	1.84544	0.12224
109	rs4805482	30299206	1KG	T	G	0.93799	0.0188506	0.034327	0.037761	0.48871	0.23193	0.871726	0.708928	1.07191	0.19307	0.924056	0.74765	1.14208	0.46492
110	rs73038998	30331965	1KG	T	C	0.90416	0.00896198	0.16004	0.1638	0.27017	0.26214	0.945162	0.848734	1.05254	0.30431	0.954706	0.85698	1.06358	0.4002
111	rs183457744	30277294	1KG	C	T	0.9209	0.00122027	0.0023863	0.0029692	1	1	0.707873	0.349646	1.43312	0.33703	0.744815	0.363855	1.52464	0.4202
112	rs1406	30315112	GWAS	C	A	--	0.136713	0.20466	0.21502	0.10767	0.099179	0.956811	0.871634	1.05031	0.35336	1.03942	0.938311	1.15142	0.459
113	rs11671136	30295633	1KG	G	A	0.98658	0.13939	0.20687	0.21761	0.12642	0.062744	0.957032	0.871654	1.05077	0.35695	1.04157	0.939769	1.1544	0.43765
114	rs10417306	30295008	1KG	T	C	0.98552	0.13921	0.20701	0.21769	0.12652	0.058934	0.957431	0.871986	1.05125	0.36171	1.042	0.940145	1.1549	0.43303
115	rs11084196	30294146	1KG	C	T	0.98413	0.139599	0.20722	0.21781	0.12655	0.055375	0.95797	0.872439	1.05189	0.3682	1.04258	0.940654	1.15556	0.42693
116	rs67237737	30302239	1KG	C	T	0.96987	0.135988	0.20661	0.21629	0.29679	0.014869	0.957867	0.871907	1.0523	0.36957	1.04233	0.939985	1.15582	0.43169
117	rs4805481	30294815	1KG	C	T	0.97922	0.137872	0.20653	0.21682	0.10926	0.062148	0.958722	0.872868	1.05302	0.37851	1.04406	0.941644	1.15761	0.41308
118	rs180772063	30286301	1KG	A	T	0.90885	0.00122152	0.0024832	0.0030054	1	1	0.728112	0.358039	1.4807	0.38095	0.767498	0.373089	1.57885	0.47212
119	rs4805483	30314459	1KG	A	G	0.96698	0.0628805	0.10916	0.11555	0.81451	0.34734	0.952623	0.842704	1.07688	0.4378	1.02869	0.903598	1.17111	0.66892
120	rs11668288	30295502	1KG	T	C	0.98397	0.140059	0.20934	0.21857	0.098374	0.067809	0.964894	0.87879	1.05943	0.45365	1.05253	0.949549	1.16669	0.32972
121	rs929813	30340381	1KG	C	T	0.98787	0.0630025	0.11732	0.11835	0.22554	1	0.960684	0.854277	1.08034	0.50305	1.03201	0.911959	1.16786	0.61752
122	rs10402908	30341553	1KG	A	G	0.98503	0.062965	0.11729	0.11835	0.22554	1	0.960665	0.854132	1.08048	0.50337	1.03214	0.911925	1.16821	0.61654
123	rs10408388	30341427	1KG	T	C	0.98534	0.062963	0.11729	0.11834	0.22554	1	0.960675	0.854153	1.08048	0.50345	1.03214	0.911939	1.16819	0.61652
124	rs11084229	30334417	1KG	C	A	0.95301	0.0749128	0.15692	0.15534	0.26189	0.40023	0.965132	0.868782	1.07217	0.50837	1.03206	0.923651	1.1532	0.57728
125	rs4804905	30338472	1KG	A	G	0.99734	0.0624955	0.11355	0.11542	0.17362	0.74202	0.961139	0.853791	1.08198	0.51185	1.03383	0.912472	1.17132	0.60153
Rank	Variant	bp	Source	Allele_1	Allele_2	IMPUTE2-score	r2 with rs8102137	MAF		p-val for HWE		Adjusted for covariates				Adjusted for covariates and rs8102137
								Cases	Controls	Cases	Controls	OR	95%CI_low	95%CI_upper	p-val	OR	95%CI_low	95%CI_upper	p-val
126	rs8103402	30319750	1KG	A	G	0.97999	0.119994	0.19981	0.20922	0.02692	0.059369	0.969724	0.881401	1.0669	0.52805	1.05139	0.94787	1.16621	0.34331
127	chr19:30314457:I	30314457	1KG	A	AG	0.9393	0.0559509	0.10663	0.11132	0.90488	0.52802	0.960905	0.847425	1.08958	0.53396	1.0401	0.910714	1.18787	0.56181
128	rs118177621	30297329	1KG	G	C	0.98588	0.0314545	0.063093	0.059841	1	0.66972	1.05174	0.896476	1.23389	0.53591	1.12705	0.955869	1.32888	0.15475
129	rs6509743	30336837	1KG	C	T	0.9754	0.0747356	0.15791	0.15604	0.30438	0.55971	0.967798	0.872097	1.074	0.5378	1.03304	0.925745	1.15277	0.56124
130	rs735319	30339140	GWAS	A	G	--	0.0634727	0.11632	0.11707	0.18468	0.96299	0.964024	0.857296	1.08404	0.54051	1.03703	0.916321	1.17365	0.56466
131	rs7254392	30336114	1KG	C	G	0.96984	0.0751849	0.15832	0.1563	0.23109	0.5604	0.968078	0.872285	1.07439	0.54169	1.03397	0.926439	1.15399	0.55098
132	chr19:30336883:D	30336883	1KG	CTT	C	0.97555	0.0747999	0.15797	0.15605	0.30438	0.55988	0.968194	0.872476	1.07441	0.54279	1.03348	0.926167	1.15324	0.55598
133	rs12971623	30333944	1KG	C	T	0.95874	0.073692	0.15585	0.1537	0.25932	0.46049	0.968643	0.871781	1.07627	0.55339	1.03574	0.926839	1.15743	0.53557
134	rs10425066	30326294	GWAS	T	C	--	0.115448	0.19793	0.20664	0.026174	0.0695	0.972434	0.884171	1.06951	0.56476	1.05228	0.949346	1.16637	0.33194
135	rs79185930	30344619	1KG	T	G	0.9519	0.0600636	0.1141	0.11512	0.25697	0.50933	0.966706	0.856764	1.09076	0.58251	1.04279	0.918039	1.18448	0.51924
136	rs76717523	30297143	1KG	C	T	0.91013	0.000551479	0.0014611	0.00067827	1	1	1.38969	0.41109	4.69784	0.59643	1.56751	0.452755	5.42699	0.47807
137	rs8104026	30316536	1KG	G	C	0.97407	0.118273	0.20122	0.20952	0.023365	0.059521	0.976184	0.88705	1.07427	0.62171	1.05883	0.954464	1.1746	0.28024
138	chr19:30325388:D	30325388	1KG	CA	C	0.99641	0.115578	0.19749	0.20571	0.025437	0.06416	0.976902	0.887939	1.07478	0.63145	1.05867	0.954713	1.17395	0.27963
139	rs10418136	30326047	1KG	C	T	0.99861	0.115518	0.19747	0.20557	0.025437	0.059961	0.977534	0.88858	1.07539	0.64066	1.05931	0.955376	1.17454	0.27416
140	rs7255959	30326564	1KG	C	T	0.9993	0.115645	0.19758	0.20559	0.03098	0.056128	0.977702	0.888776	1.07553	0.64301	1.05932	0.955462	1.17446	0.27369
141	rs10410784	30325762	1KG	G	A	0.91232	3.57e-06	0.0002601	0.0001085	1	1	1.89233	0.120349	29.7545	0.65003	1.89973	0.120961	29.8357	0.64789
142	rs12983296	30327352	1KG	G	C	0.99903	0.115645	0.19778	0.20566	0.03106	0.052478	0.978715	0.889702	1.07663	0.65832	1.06045	0.956506	1.17568	0.26481
143	rs11883361	30327503	1KG	C	T	0.99906	0.115645	0.19782	0.20567	0.03106	0.052496	0.978912	0.889884	1.07685	0.66129	1.06066	0.956707	1.17591	0.26313
144	rs728427	30328212	GWAS	C	T	--	0.115264	0.19793	0.20577	0.026174	0.060166	0.979381	0.890305	1.07737	0.66846	1.06105	0.95708	1.17631	0.26006
145	rs1862542	30328851	1KG	C	T	0.99688	0.115392	0.19808	0.20568	0.026217	0.052496	0.981472	0.892098	1.0798	0.70105	1.0638	0.959438	1.17952	0.24038
146	rs11084238	30344435	1KG	C	T	0.95825	0.0545942	0.10429	0.10699	0.46329	0.36594	0.982244	0.8655	1.11473	0.78138	1.0612	0.928945	1.21227	0.38175
147	rs12462504	30344208	1KG	T	C	0.91626	0.00695169	0.042638	0.039976	0.39163	0.61689	0.975854	0.805258	1.18259	0.80312	0.998252	0.82239	1.21172	0.98589
148	chr19:30273475:D	30273475	1KG	GTC	G	0.93397	0.031767	0.10747	0.11119	0.81173	0.0047757	1.01399	0.893446	1.1508	0.82961	1.05545	0.927834	1.20062	0.41175
149	rs36193392	30317537	1KG	C	T	0.9304	0.020471	0.064808	0.063101	0.44564	0.37071	1.01293	0.863099	1.18877	0.87501	1.05858	0.899397	1.24594	0.49354
150	rs116871382	30336763	1KG	C	T	0.9264	0.00827189	0.041708	0.039212	0.37855	0.70069	0.986056	0.812413	1.19681	0.88702	1.01075	0.831301	1.22893	0.91461
151	rs11666333	30280567	1KG	C	T	0.93376	0.0364997	0.1074	0.11091	0.8111	0.0021222	1.00827	0.888687	1.14395	0.89822	1.05186	0.924752	1.19644	0.44162
152	rs184184366	30323246	1KG	C	T	0.91968	0.00851055	0.041704	0.038858	0.37855	0.79698	0.989446	0.813828	1.20296	0.91525	1.0162	0.834282	1.23779	0.87313
153	rs79022614	30328803	1KG	G	A	0.9238	0.00835729	0.041714	0.038787	0.37855	0.79697	0.989741	0.81424	1.20307	0.91753	1.01574	0.834114	1.23691	0.87654
154	rs77319773	30321724	1KG	A	G	0.92023	0.00906111	0.043531	0.039831	0.40387	1	1.01012	0.832954	1.22496	0.91853	1.03934	0.855398	1.26284	0.6978
155	rs146454552	30293646	1KG	C	A	0.93432	0.00786702	0.018844	0.020419	0.49088	1	0.985466	0.742055	1.30872	0.91943	1.05673	0.790495	1.41263	0.70946
156	rs12460396	30325377	1KG	T	C	0.92402	0.00848979	0.041653	0.038671	0.37855	0.79577	0.990261	0.814539	1.20389	0.92177	1.0166	0.834678	1.23818	0.86998
157	rs138512713	30323463	1KG	G	A	0.92052	0.00847218	0.041707	0.03877	0.37855	0.79655	0.990988	0.815034	1.20493	0.92767	1.01769	0.835441	1.2397	0.86171
158	rs12982841	30331915	1KG	G	A	0.96559	0.0582566	0.10824	0.11034	0.40799	0.76921	0.994524	0.878085	1.1264	0.93113	1.07425	0.942451	1.22448	0.2835
159	rs117977791	30337645	1KG	C	T	0.99213	0.0584473	0.1096	0.11089	0.48302	0.80762	0.995036	0.880556	1.1244	0.93639	1.07426	0.944641	1.22167	0.27488
160	rs114270658	30333745	1KG	C	T	0.8996	0.000100885	0.00075155	0.00041646	1	1	0.959925	0.228453	4.03346	0.95547	0.990951	0.234657	4.18477	0.99013
161	rs143221530	30278131	1KG	A	G	0.90266	7.38e-05	0.00077539	0.00041383	1	1	1.03276	0.240437	4.43609	0.96542	1.06257	0.246554	4.57936	0.9351
162	rs147273499	30325292	1KG	C	G	0.91397	0.000100871	0.00075751	0.00040725	1	1	0.982116	0.232542	4.14786	0.98041	1.01306	0.238584	4.30159	0.98597
163	rs182489308	30283001	1KG	A	G	1		0	0	1	1
164	rs187849648	30287137	1KG	A	T	1		0	0	1	1
